# Supplementary material for: Diastereoselective vinylalumination for the synthesis of pericosine A, B and C
Source: Royal Society of Chemistry journal article supplement (doi:10.1039/c3ra45871g), 2013-10-31
Supplement: c3ra45871g.pdf [file c3ra45871g.pdf]

## Supporting Information

### Diastereoselective vinylaluminum for the synthesis of pericosine A, B and C

Long-Shiang Li and Duen-Ren Hou\*

Department of Chemistry, National Central University, Jhong-Li City, Taoyuan,  
Taiwan 32001

[drhou@ncu.edu.tw](mailto:drhou@ncu.edu.tw)

### Table of Contents

|                                                           |    |
|-----------------------------------------------------------|----|
| <sup>1</sup> H NMR for the compound <b>5</b> .....        | 3  |
| <sup>13</sup> C NMR for the compound <b>5</b> .....       | 4  |
| <sup>1</sup> H NMR for the compound <b>6</b> .....        | 5  |
| <sup>13</sup> C NMR for the compound <b>6</b> .....       | 6  |
| <sup>1</sup> H NMR for the compound <b>7a</b> .....       | 7  |
| <sup>13</sup> C NMR for the compound <b>7a</b> .....      | 8  |
| <sup>1</sup> H NMR for the compound <b>9</b> .....        | 9  |
| <sup>13</sup> C NMR for the compound <b>9</b> .....       | 10 |
| <sup>1</sup> H NMR for the compound <b>10</b> .....       | 11 |
| <sup>13</sup> C NMR for the compound <b>10</b> .....      | 12 |
| <sup>1</sup> H NMR for the compound <b>7b</b> .....       | 13 |
| <sup>13</sup> C NMR for the compound <b>7b</b> .....      | 14 |
| <sup>1</sup> H NMR for the compound <b>11a</b> .....      | 15 |
| <sup>13</sup> C NMR for the compound <b>11a</b> .....     | 16 |
| <sup>1</sup> H NMR for the compound <b>12a</b> .....      | 17 |
| <sup>13</sup> C NMR for the compound <b>12a</b> .....     | 18 |
| <sup>1</sup> H NMR for the compound <b>11b+12b</b> .....  | 19 |
| <sup>13</sup> C NMR for the compound <b>11b+12b</b> ..... | 20 |
| <sup>1</sup> H NMR for the compound <b>13</b> .....       | 21 |
| <sup>13</sup> C NMR for the compound <b>13</b> .....      | 22 |

|                                                                        |    |
|------------------------------------------------------------------------|----|
| <sup>1</sup> H NMR for the compound <b>14</b> .....                    | 23 |
| <sup>13</sup> C NMR for the compound <b>14</b> .....                   | 24 |
| <sup>1</sup> H NMR for the compound <b>15</b> .....                    | 25 |
| <sup>13</sup> C NMR for the compound <b>15</b> .....                   | 26 |
| <sup>1</sup> H NMR for the compound <b>16</b> .....                    | 27 |
| <sup>13</sup> C NMR for the compound <b>16</b> .....                   | 28 |
| <sup>1</sup> H NMR for the compound <b>2b</b> .....                    | 29 |
| <sup>1</sup> H NMR (D <sub>2</sub> O) for the compound <b>2b</b> ..... | 30 |
| <sup>13</sup> C NMR for the compound <b>2b</b> .....                   | 31 |
| <sup>1</sup> H NMR for the compound <b>2c</b> .....                    | 32 |
| <sup>13</sup> C NMR for the compound <b>2c</b> .....                   | 33 |
| <sup>1</sup> H NMR for the compound <b>17</b> .....                    | 34 |
| <sup>13</sup> C NMR for the compound <b>17</b> .....                   | 35 |
| <sup>1</sup> H NMR for the compound <b>18</b> .....                    | 36 |
| <sup>13</sup> C NMR for the compound <b>18</b> .....                   | 37 |

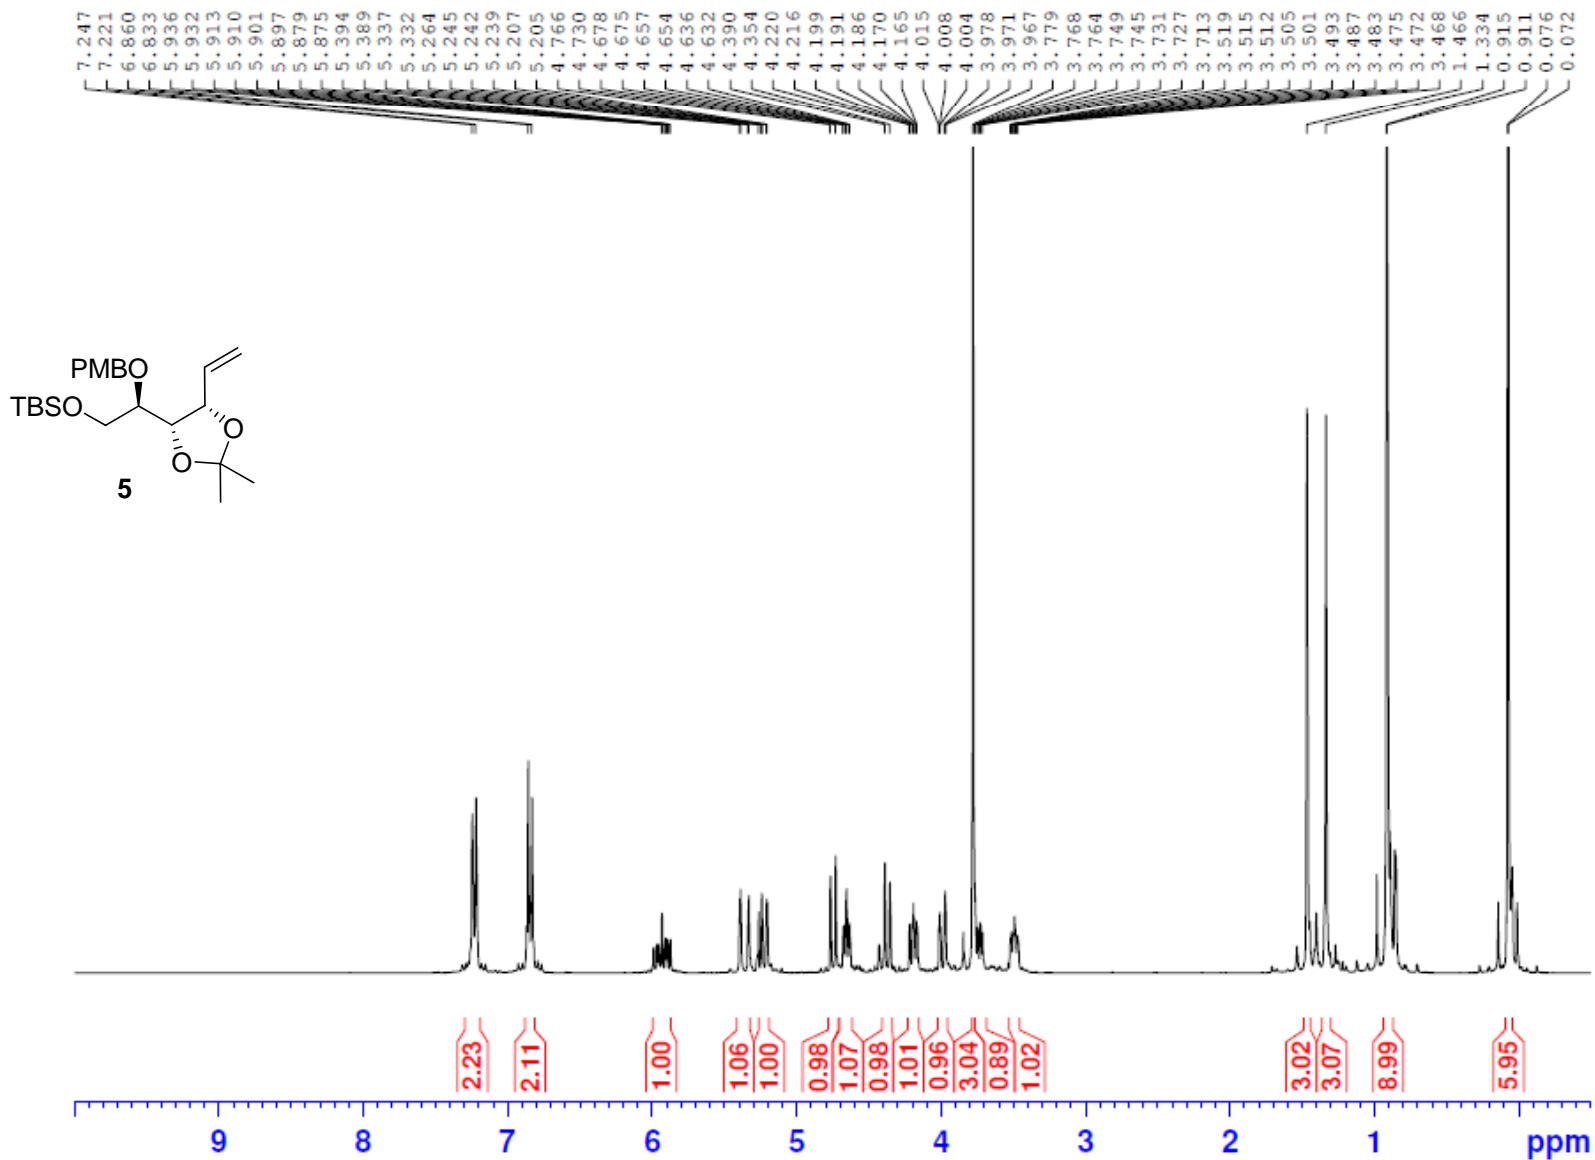

<sup>1</sup>H NMR (300 MHz CDCl<sub>3</sub>) of compound **5**

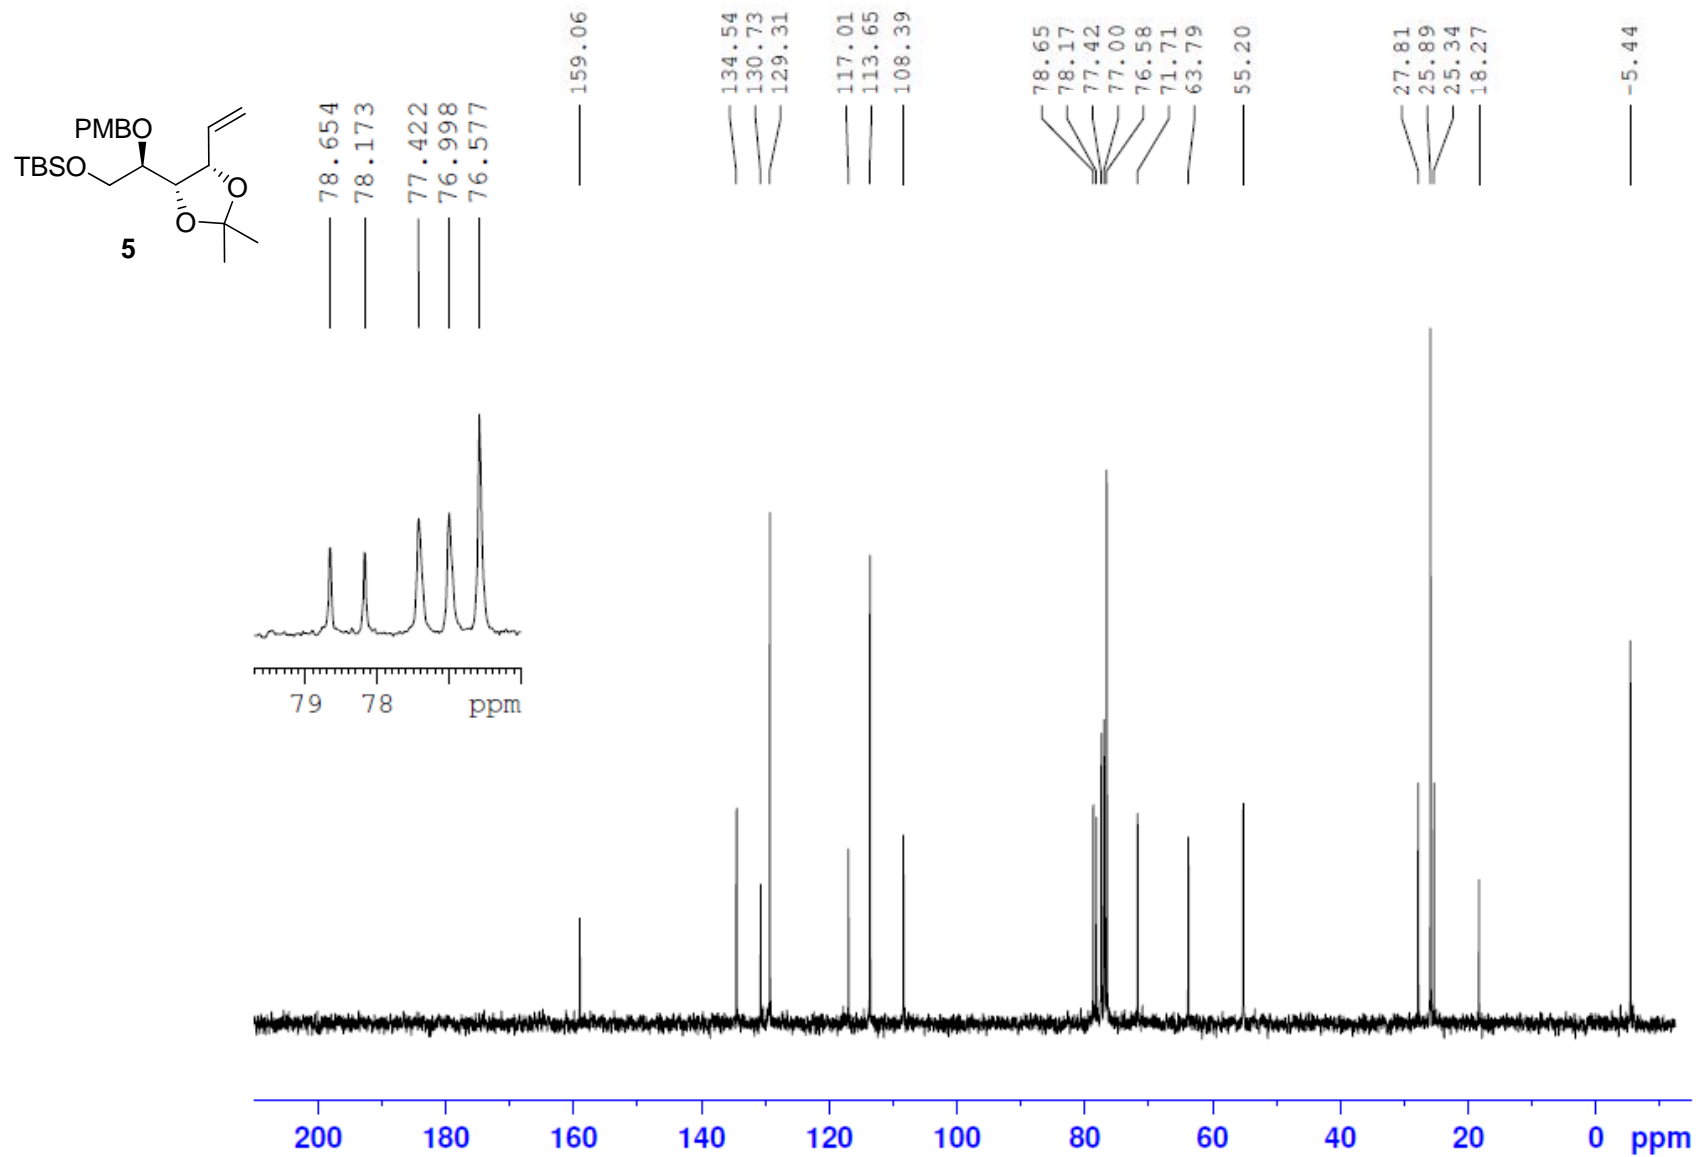

$^{13}\text{C}$  NMR (75 MHz  $\text{CDCl}_3$ ) of compound **5**

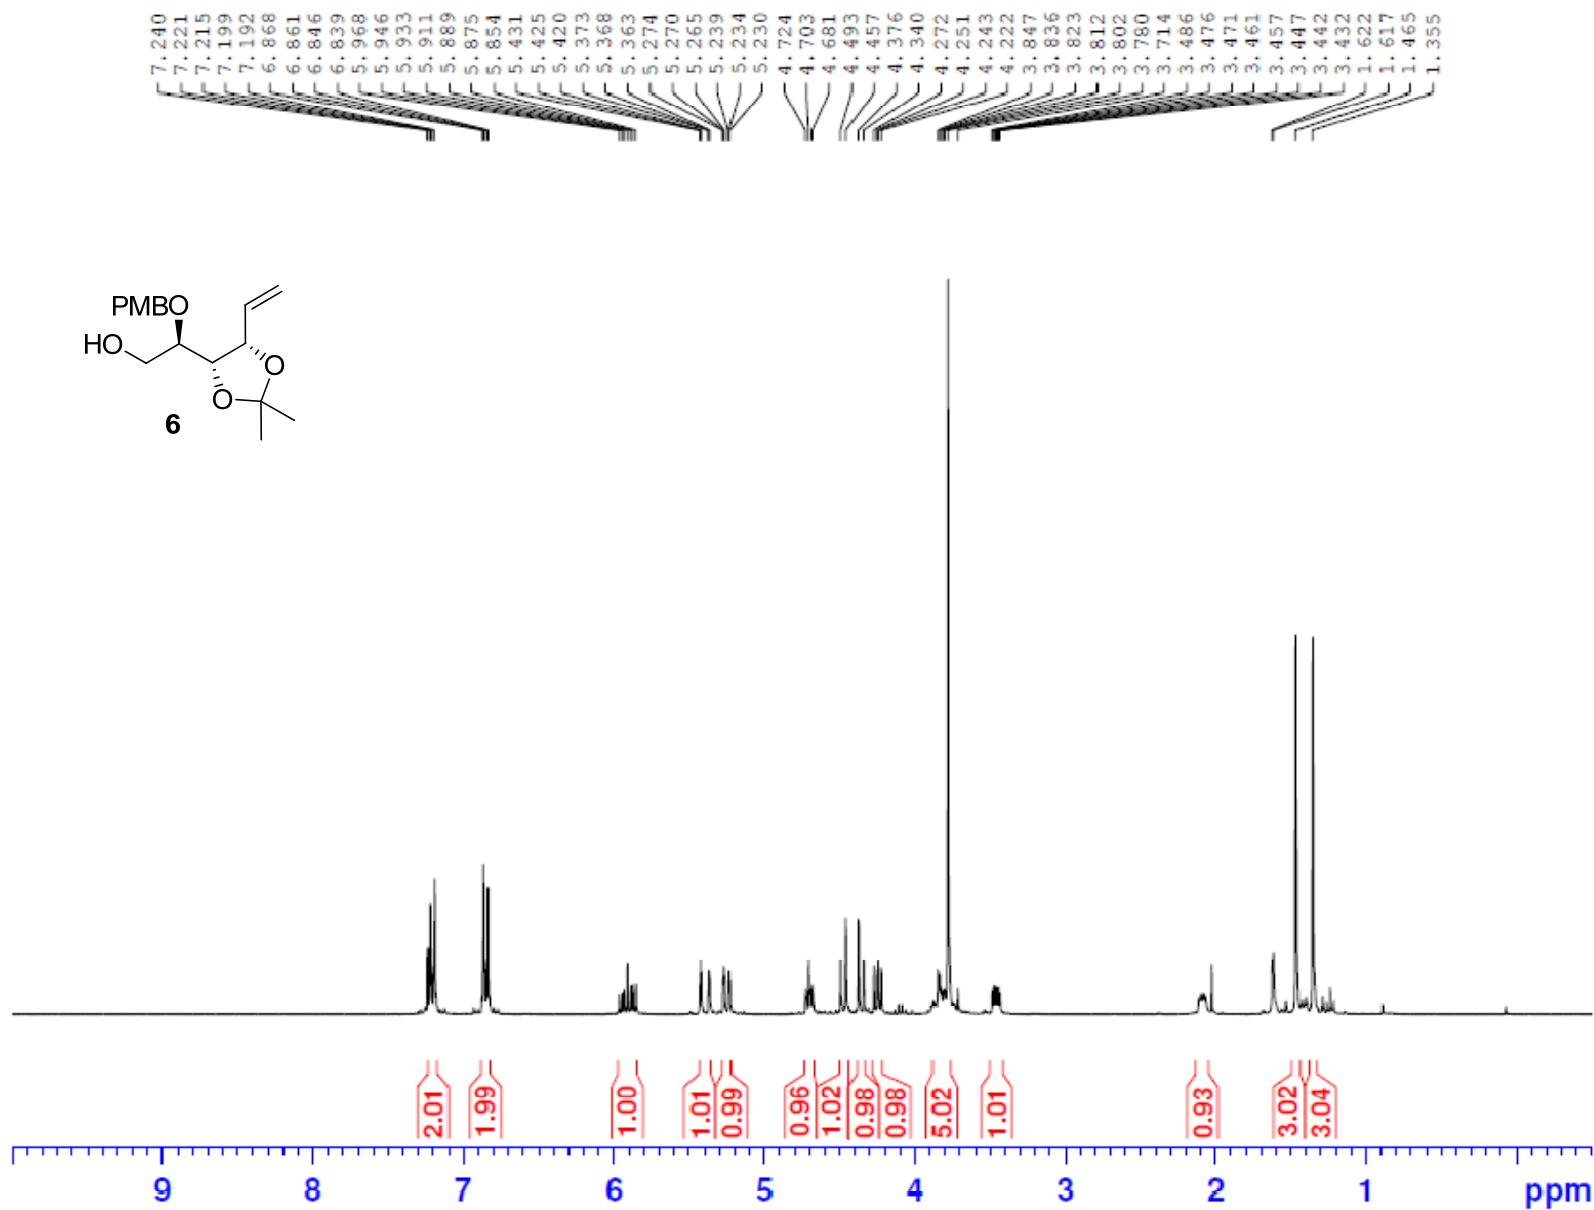

<sup>1</sup>H NMR (300 MHz CDCl<sub>3</sub>) of compound **6**

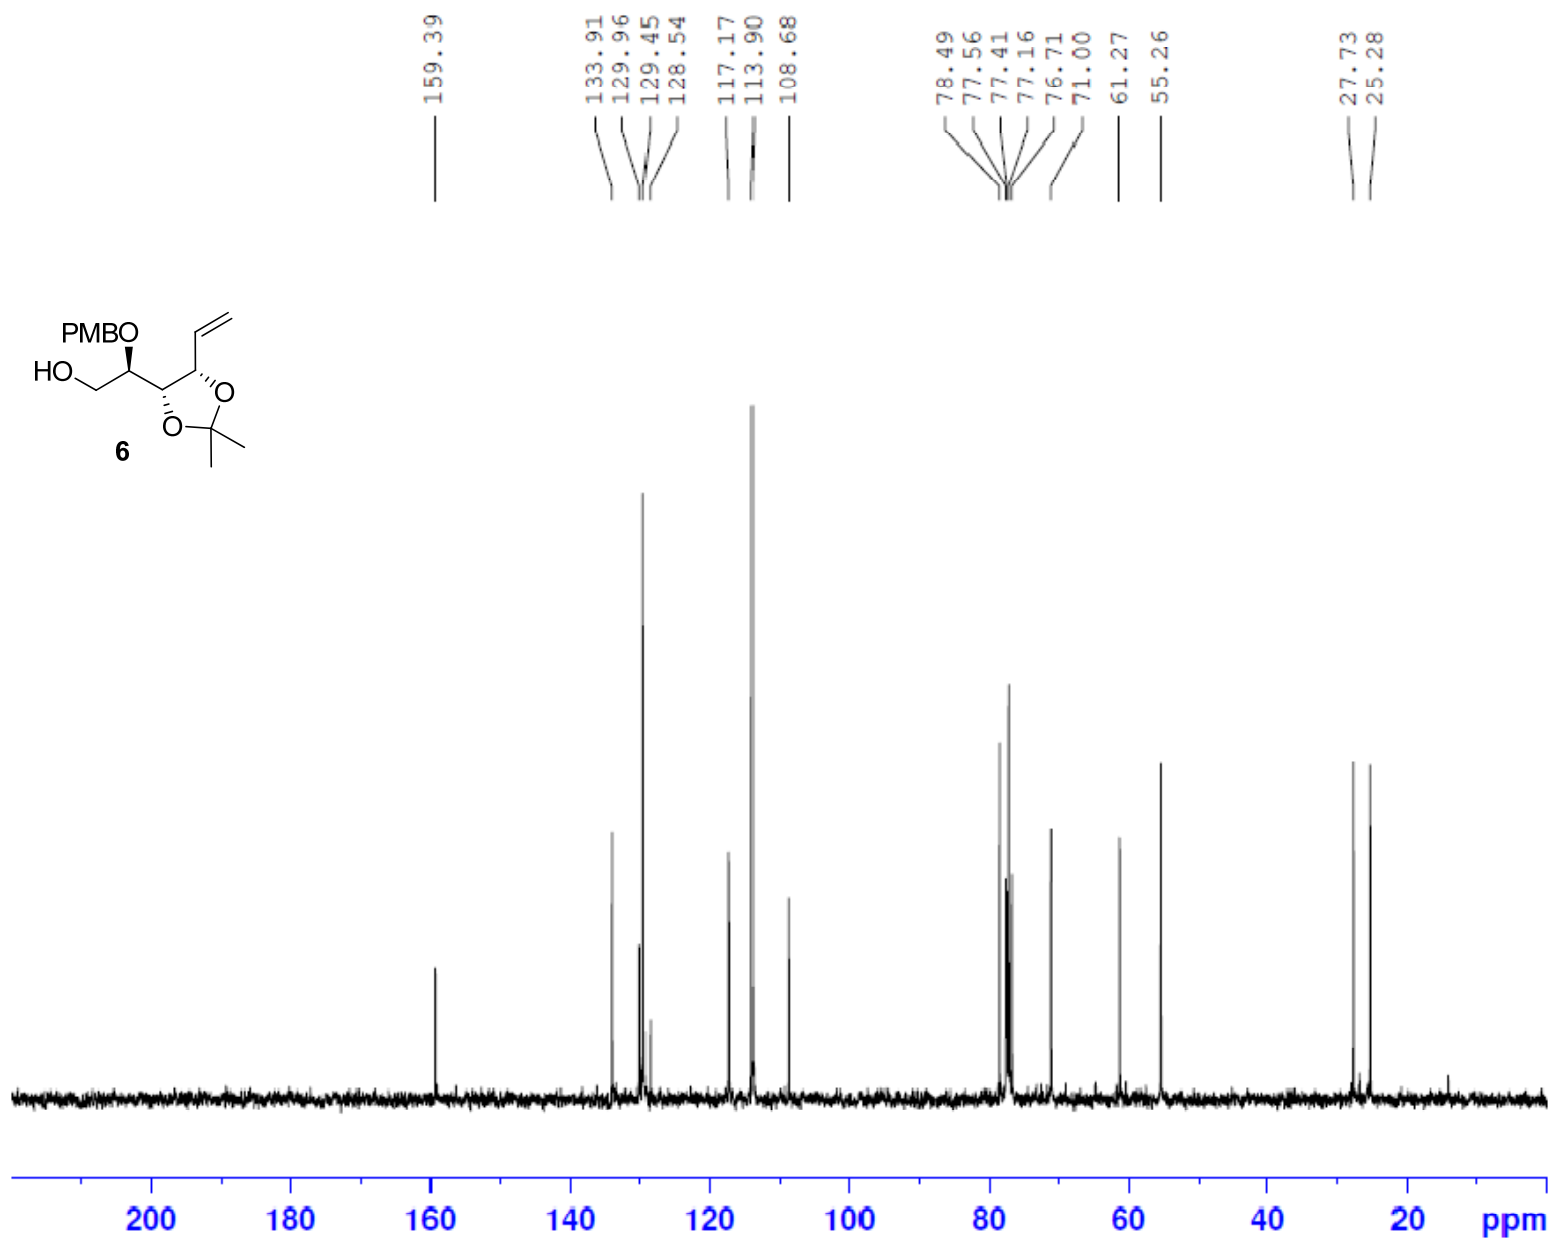

<sup>13</sup>C NMR (75 MHz CDCl<sub>3</sub>) of compound **6**

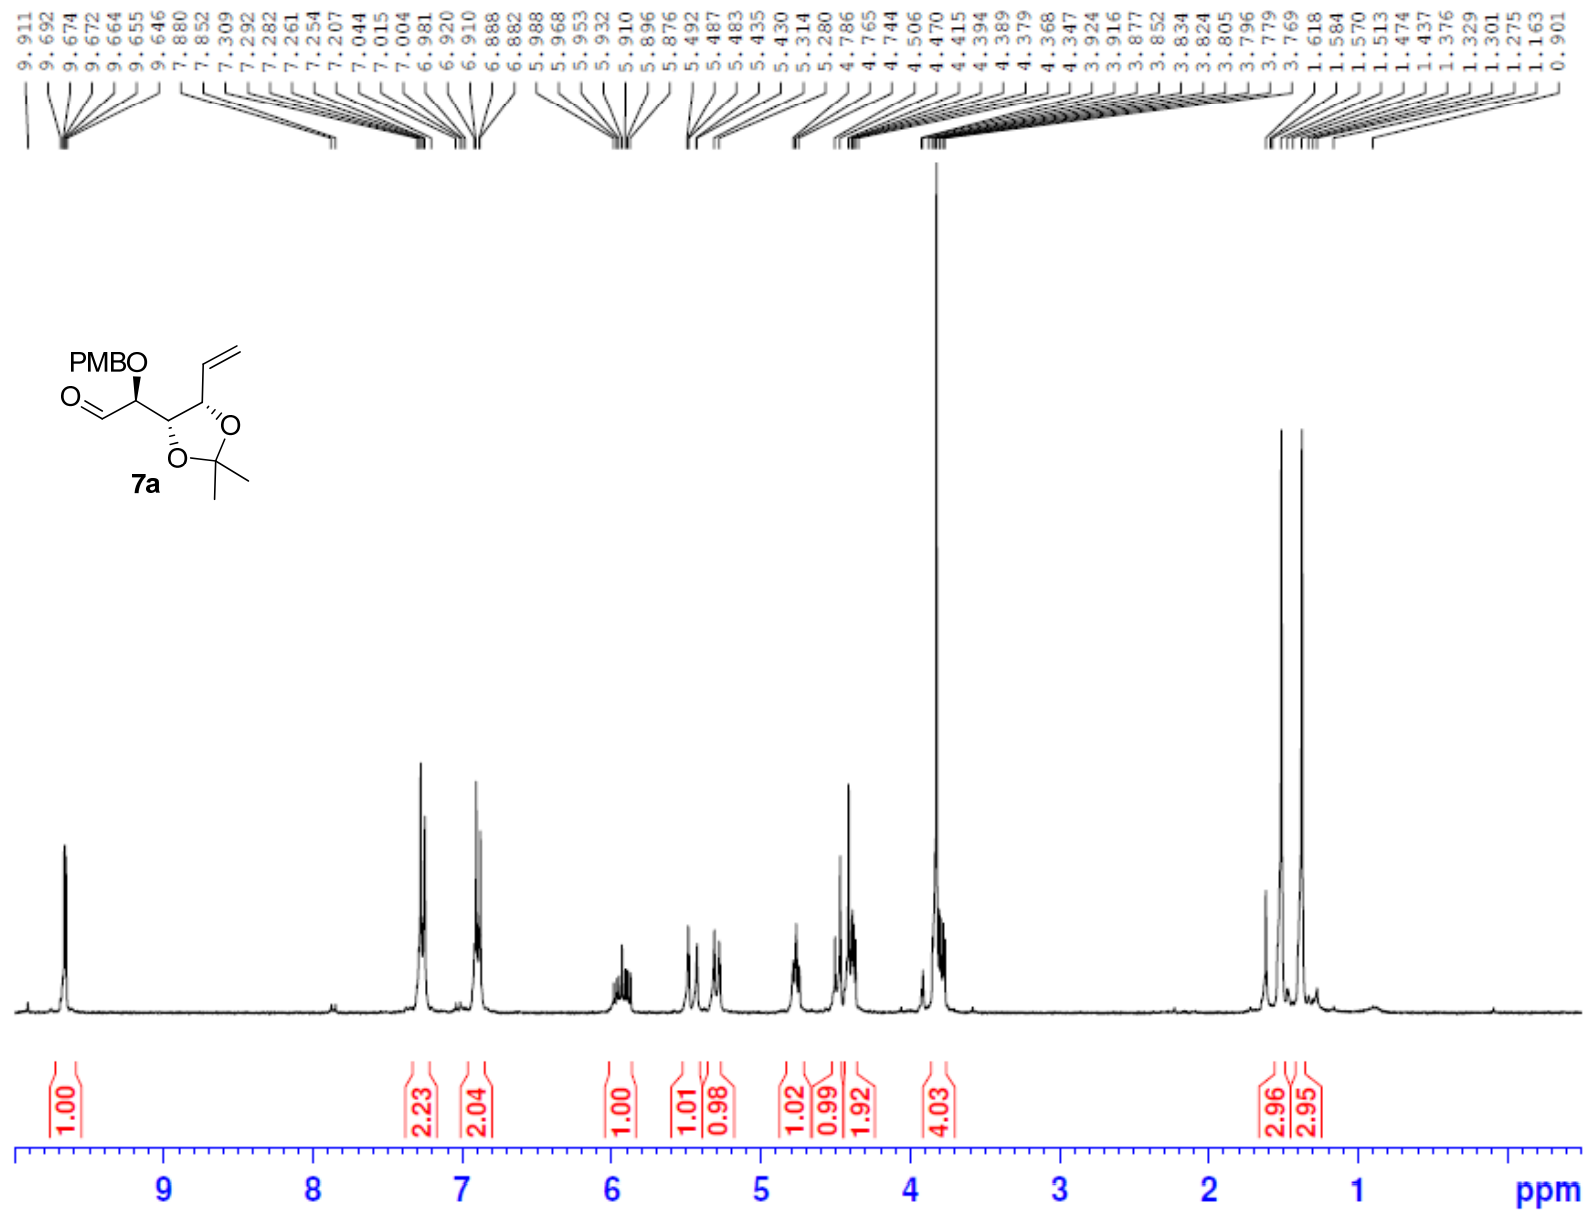

<sup>1</sup>H NMR (300 MHz CDCl<sub>3</sub>) of compound **7a**

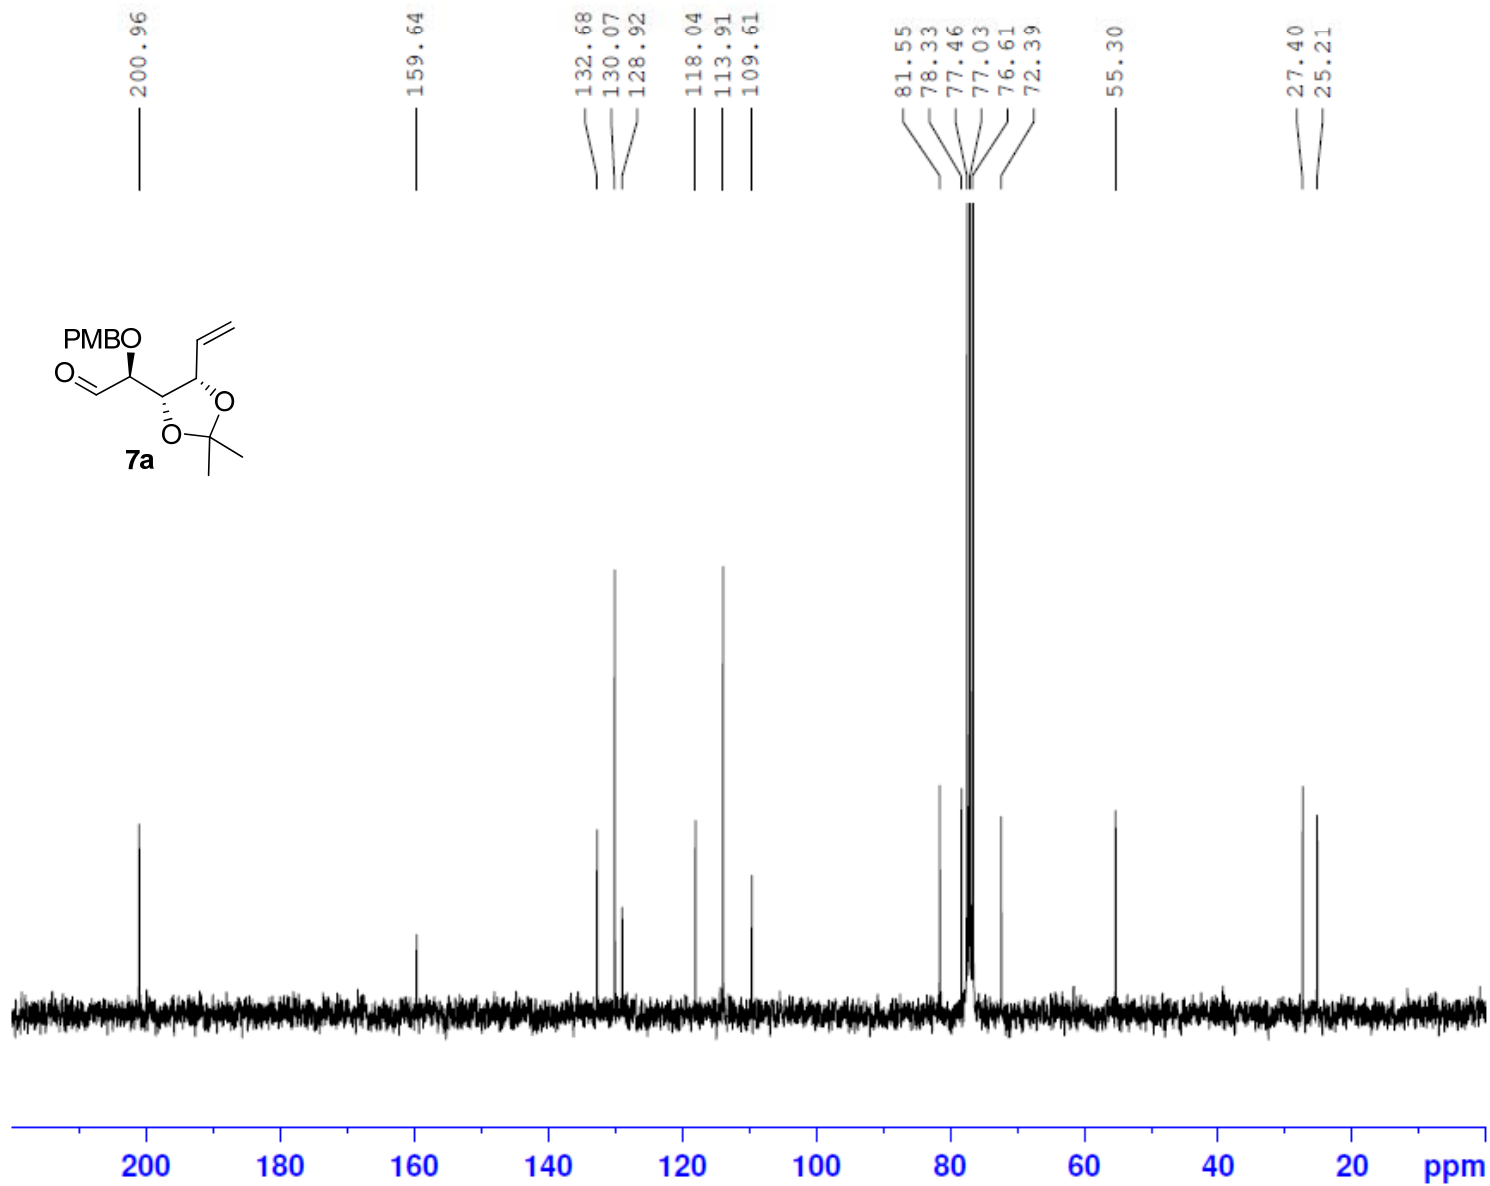

$^{13}\text{C}$  NMR (75 MHz  $\text{CDCl}_3$ ) of compound **7a**



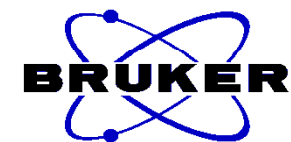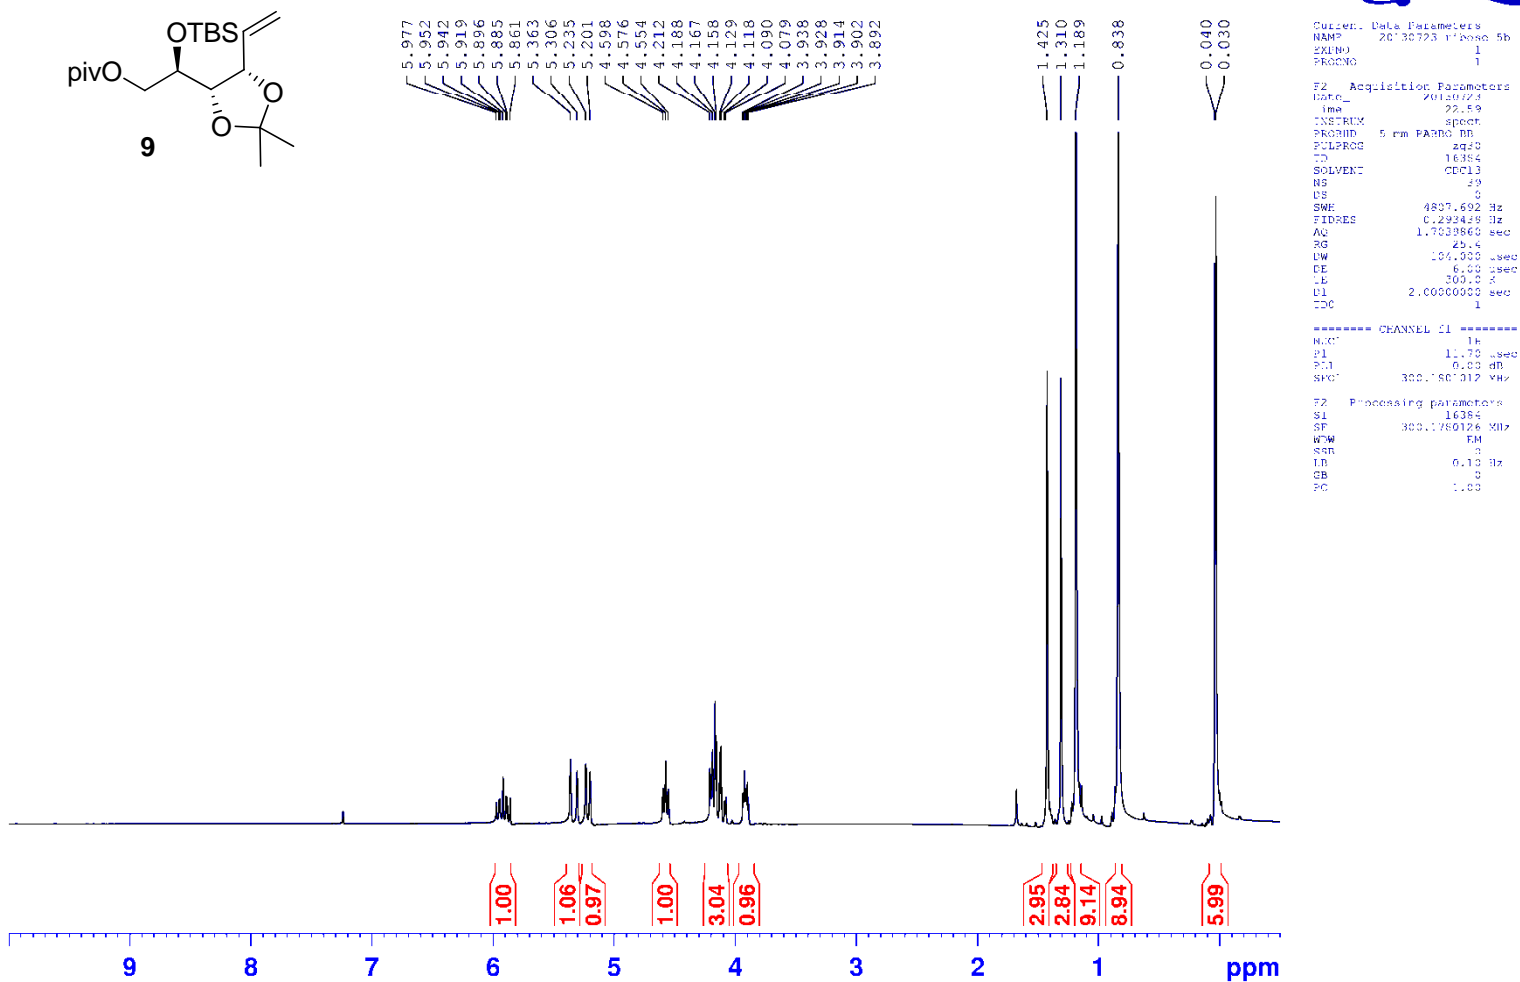

$^1\text{H}$  NMR (300 MHz  $\text{CDCl}_3$ ) of compound **9**

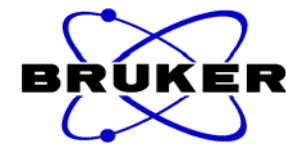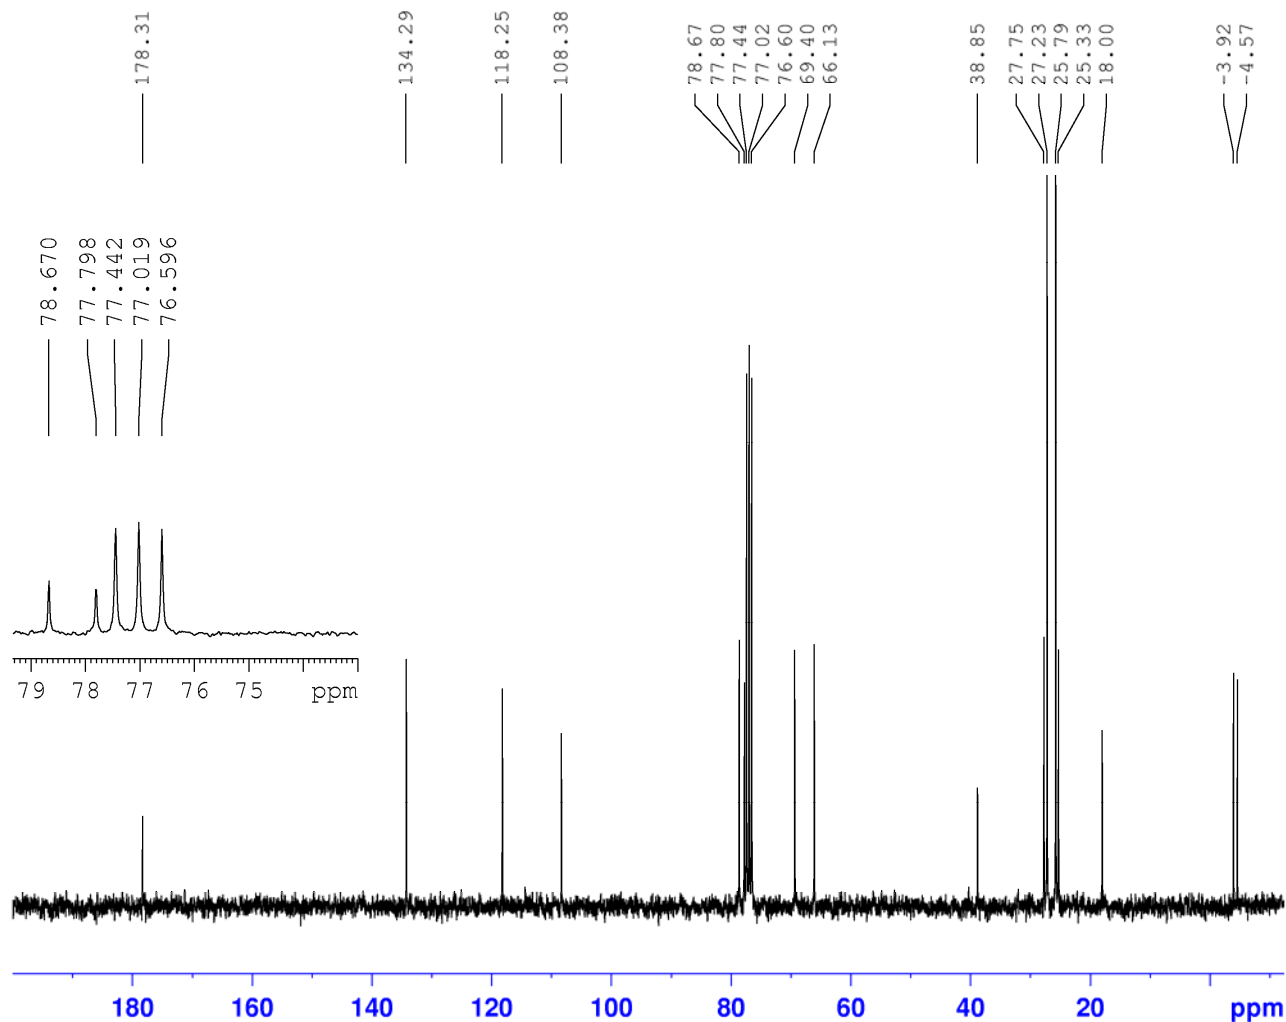

Current Data Parameters  
NAME 20130723 ribose 5b c13  
EXPNO 1  
PROCNO 1

F2 - Acquisition Parameters  
Date\_ 20130723  
Time 23.10  
INSTRUM spect  
PROBHD 5 mm F4BBO BB-  
PULPROG zgpg30  
TD 32768  
SOLVENT CDCl3  
NS 91  
DS 0  
SWH 19230.770 Hz  
FIDRES 0.586877 Hz  
AQ 0.8520180 sec  
RG 203  
DW 26.000 usec  
DE 6.00 usec  
TE 300.0 K  
D1 2.0000000 sec  
d11 0.0300000 sec  
DELTA 1.8999998 sec  
TDO 1

----- CHANNEL f1 -----  
NUC1 13C  
P1 9.85 usec  
PL1 0.00 dB  
SFO1 75.4884982 MHz

----- CHANNEL f2 -----  
CPDPRG2 waltz16  
NUC2 1H  
PCPD2 90.00 usec  
PL12 17.70 dB  
PL13 20.70 dB  
PL2 0.00 dB  
SFO2 300.1792007 MHz

F2 - Processing parameters  
SI 16384  
SF 75.4798180 MHz  
WDW EM  
SSB 0  
LB 2.00 Hz  
GB 0  
PC 1.00

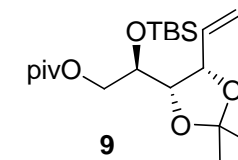

$^{13}\text{C}$  NMR (75 MHz  $\text{CDCl}_3$ ) of compound 9

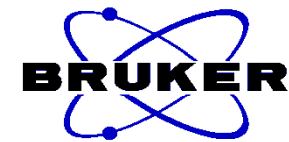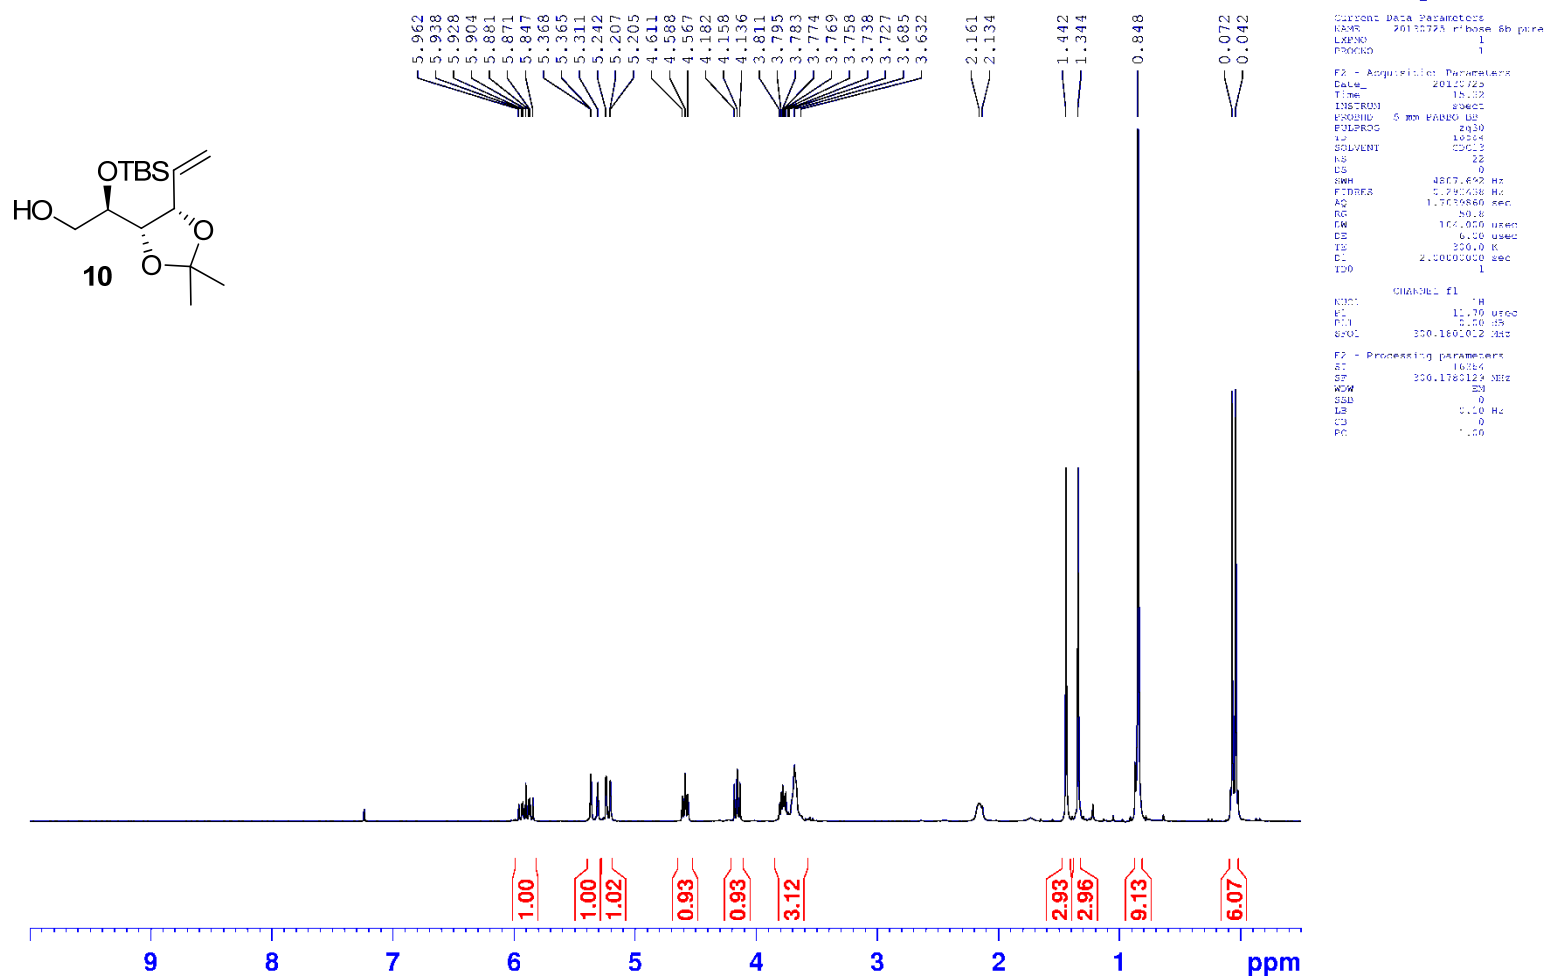

$^1\text{H}$  NMR (300 MHz  $\text{CDCl}_3$ ) of compound **10**

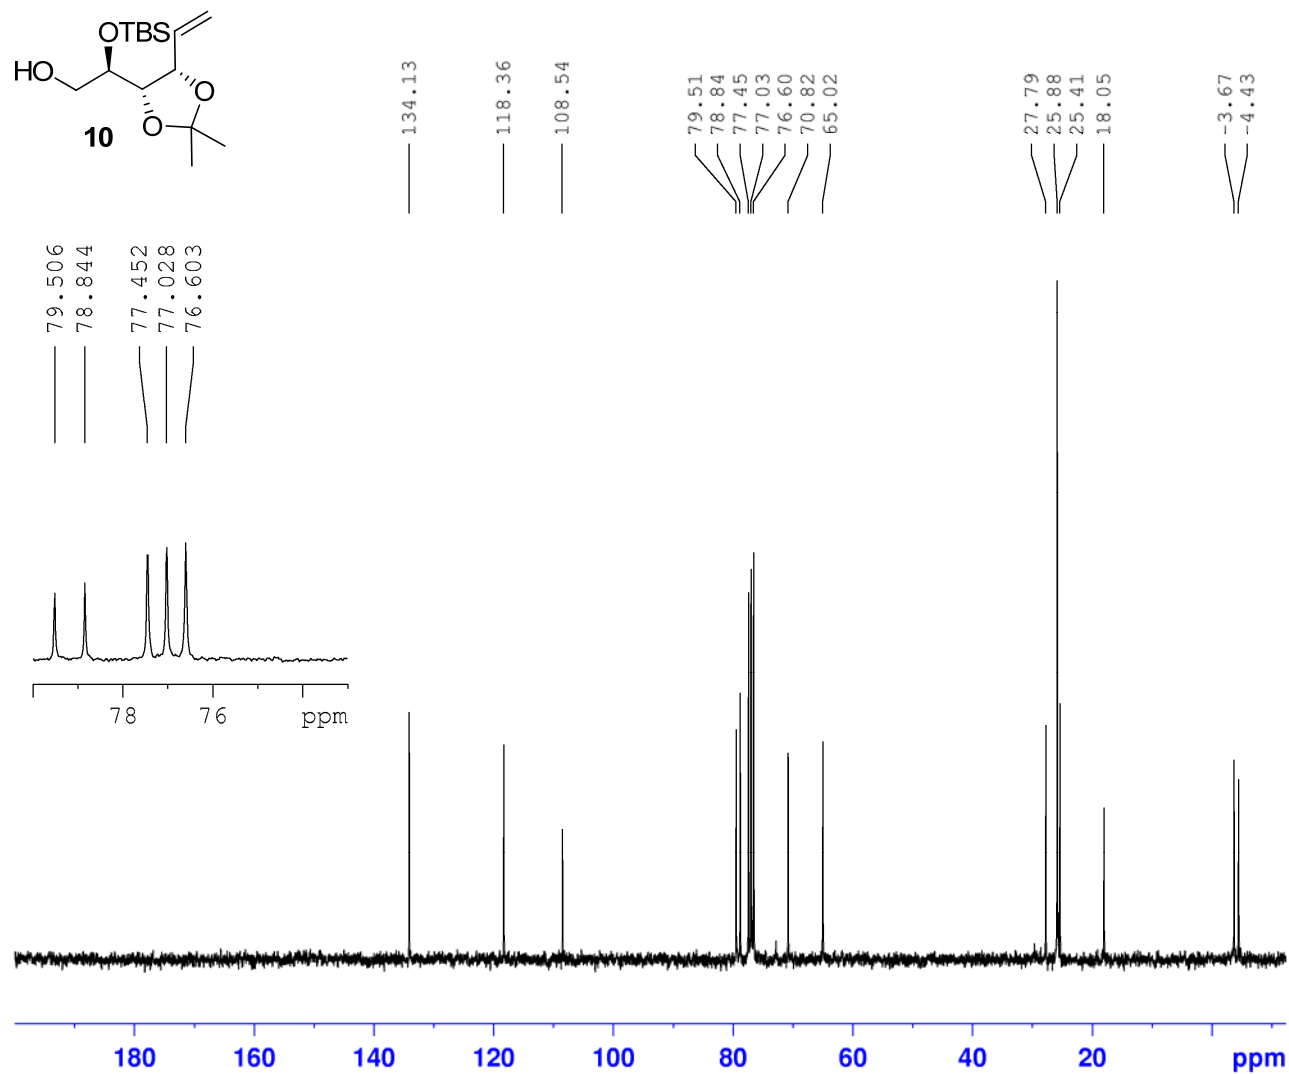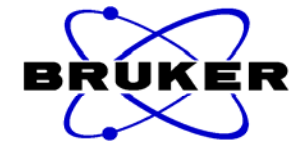

```
Current Data Parameters
NAME      20130725_ribose_6b_pure_C13
EXPNO    1
PROCNO   1

F2 - Acquisition Parameters
Date_    20130725
Time     15.35
INSTRUM spect
PROBHD   5 mm PABBO BB-
PULPROG zgpg30
TD       32768
SOLVENT  CDCl3
NS       202
DS       0
SWH      20000.000 Hz
FIDRES   0.619352 Hz
AQ       0.8192500 sec
RG       203
DW       25.000 usec
DE       6.00 usec
TE       300.0 K
D1       2.0000000 sec
d11      0.0300000 sec
DELTA   1.8999998 sec
TD0      1

===== CHANNEL f1 =====
NUC1     13C
P1       9.85 usec
PL1     0.00 dB
SFO1    75.4884982 MHz

===== CHANNEL f2 =====
CPDPRG2  waltz16
NUC2     1H
PCPD2   90.00 usec
PL12    17.70 dB
PL13    20.70 dB
PL2     0.00 dB
SFO2    300.1792007 MHz

F2 - Processing parameters
SI       16384
SF       75.4798180 MHz
WUW      EM
SGB      0
LB       2.00 Hz
GB       0
PC       1.00
```

<sup>13</sup>C NMR (75 MHz CDCl<sub>3</sub>) of compound **10**

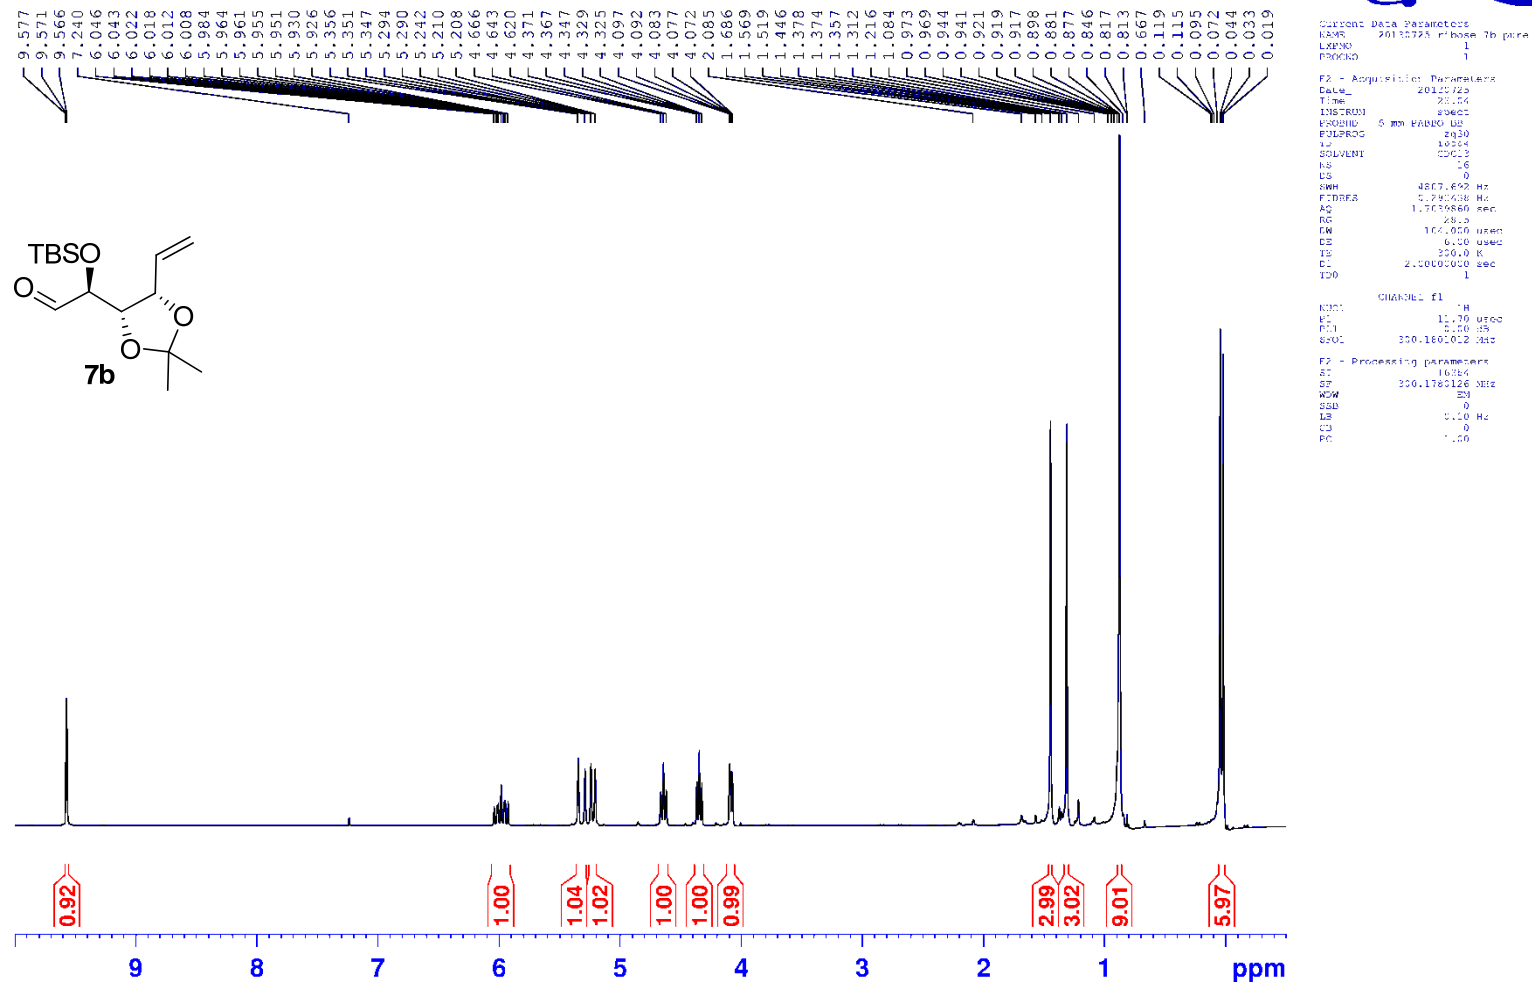

<sup>1</sup>H NMR (300 MHz CDCl<sub>3</sub>) of compound **7b**

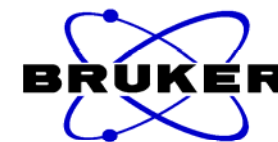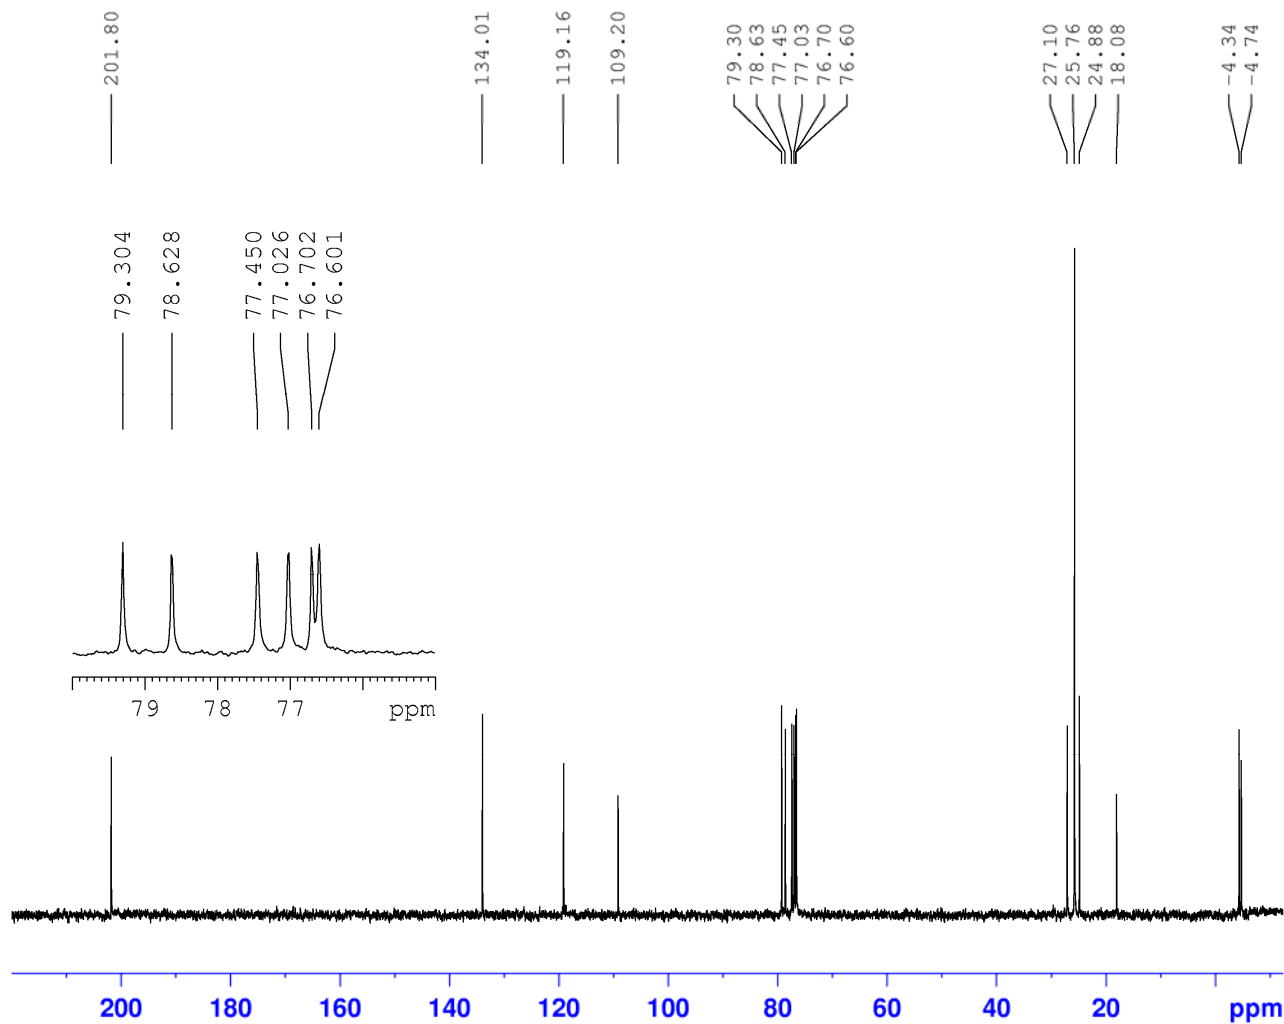

```
Current Data Parameters
NAME      20130725_ribose_7b_pure_C13
EXPNO    1
PROCNO   1

F2 - Acquisition Parameters
Date_    20130725
Time     23.13
INSTRUM spect
PROBHD   5 mm PABBO BB-
PULPROG zgpg30
TD       32768
SOLVENT  CDCl3
NS       122
DS       0
SWH      19230.770 Hz
FIDRES   0.34667 Hz
AQ       0.6520180 sec
RG       203
DW       26.000 usec
DE       6.00 usec
TE       300.0 K
D1       2.00000000 sec
d11      0.03000000 sec
DELTA    1.89999998 sec
TD0      1

===== CHANNEL f1 =====
NUC1     13C
P1       9.85 usec
PL1      0.00 dB
SFO1     75.4884982 MHz

===== CHANNEL f2 =====
CPDPRG2  waltz16
NUC2     1H
PCPD2    90.00 usec
PL12     17.70 dB
PL13     20.70 dB
PL2      0.00 dB
SFO2     300.1792007 MHz

F2 - Processing parameters
SI       16384
SF       75.4798180 MHz
WDW      EM
SSB      0
LB       2.00 Hz
GB       0
PC       1.00
```

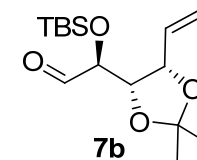

$^{13}\text{C}$  NMR (75 MHz  $\text{CDCl}_3$ ) of compound **7b**

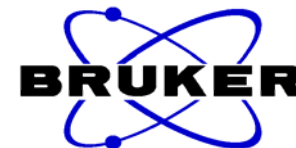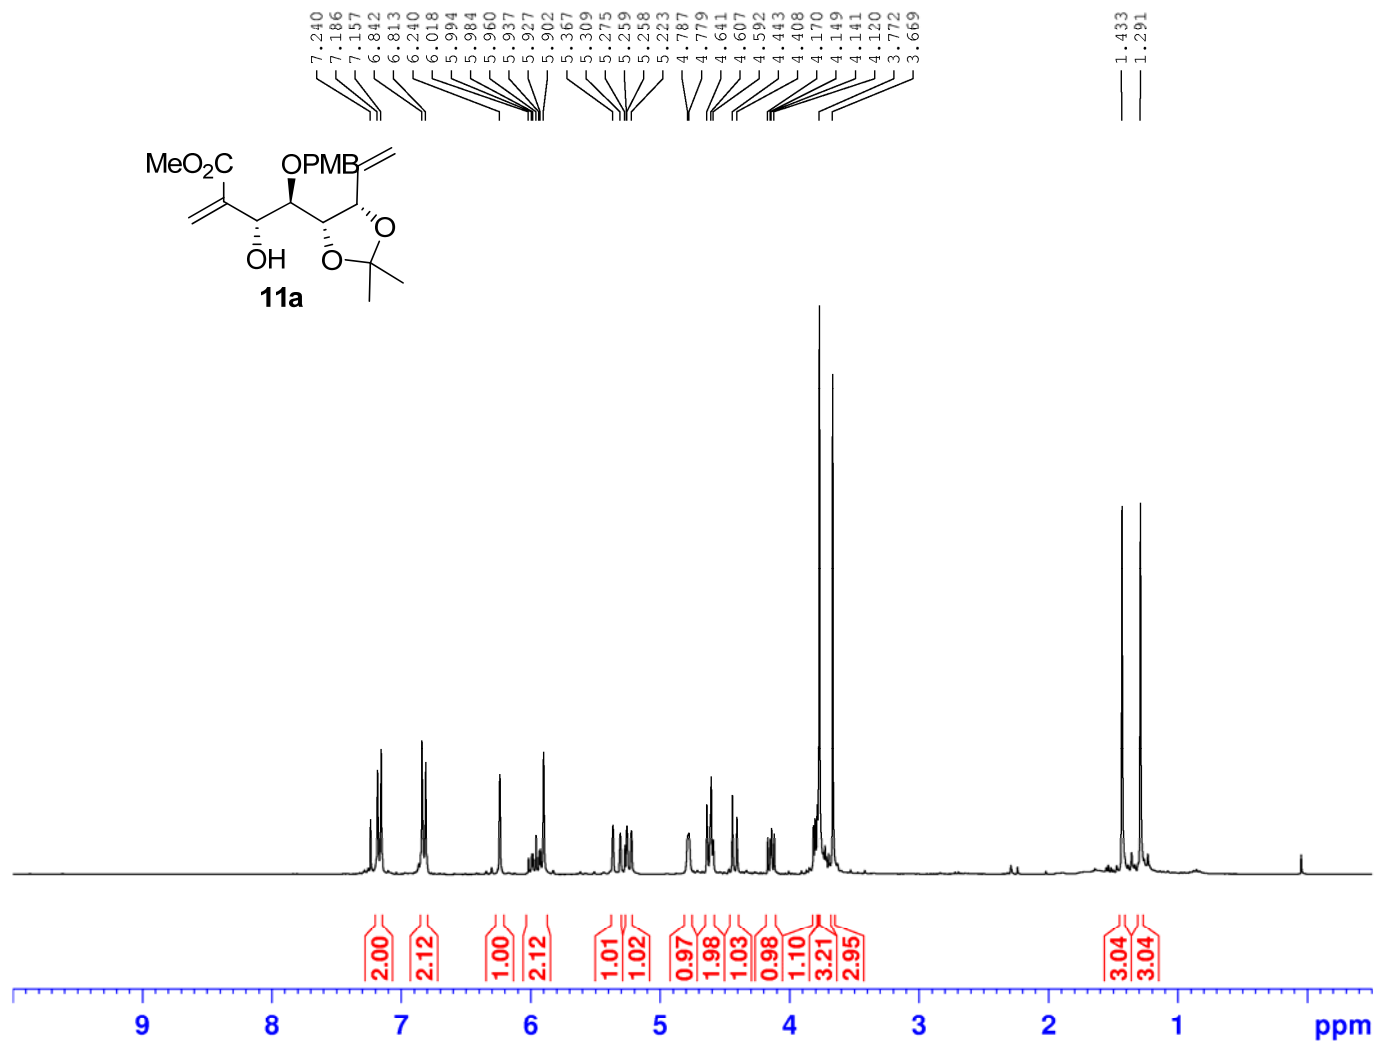

```
Current Data Parameters
NAME      20130723 r1Dose 6a
EXPNO     1
PROCNO    1

F2 - Acquisition Parameters
Date_     20130723
Time      11.36
INSTRUM   spect
PROBHD    5 mm PABBO BB-
PULPROG   zg30
TD         16384
SOLVENT   CDCl3
NS         132
DS         0
SWH        4807.692 Hz
FIDRES     0.293438 Hz
AQ         1.7039860 sec
RG         161
DW         104.000 usec
DE         6.00 usec
TE         300.0 K
D1         2.00000000 sec
TD0        1

----- CHANNEL f1 -----
NUC1       1H
P1         11.70 usec
Pl1        0.00 dB
SFO1       300.1801012 MHz

F2 - Processing parameters
SI         16384
SF         300.1780129 MHz
WDW        EM
SSB        0
LB         0.10 Hz
GB         0
PC         1.00
```

<sup>1</sup>H NMR (300 MHz CDCl<sub>3</sub>) of compound **11a**

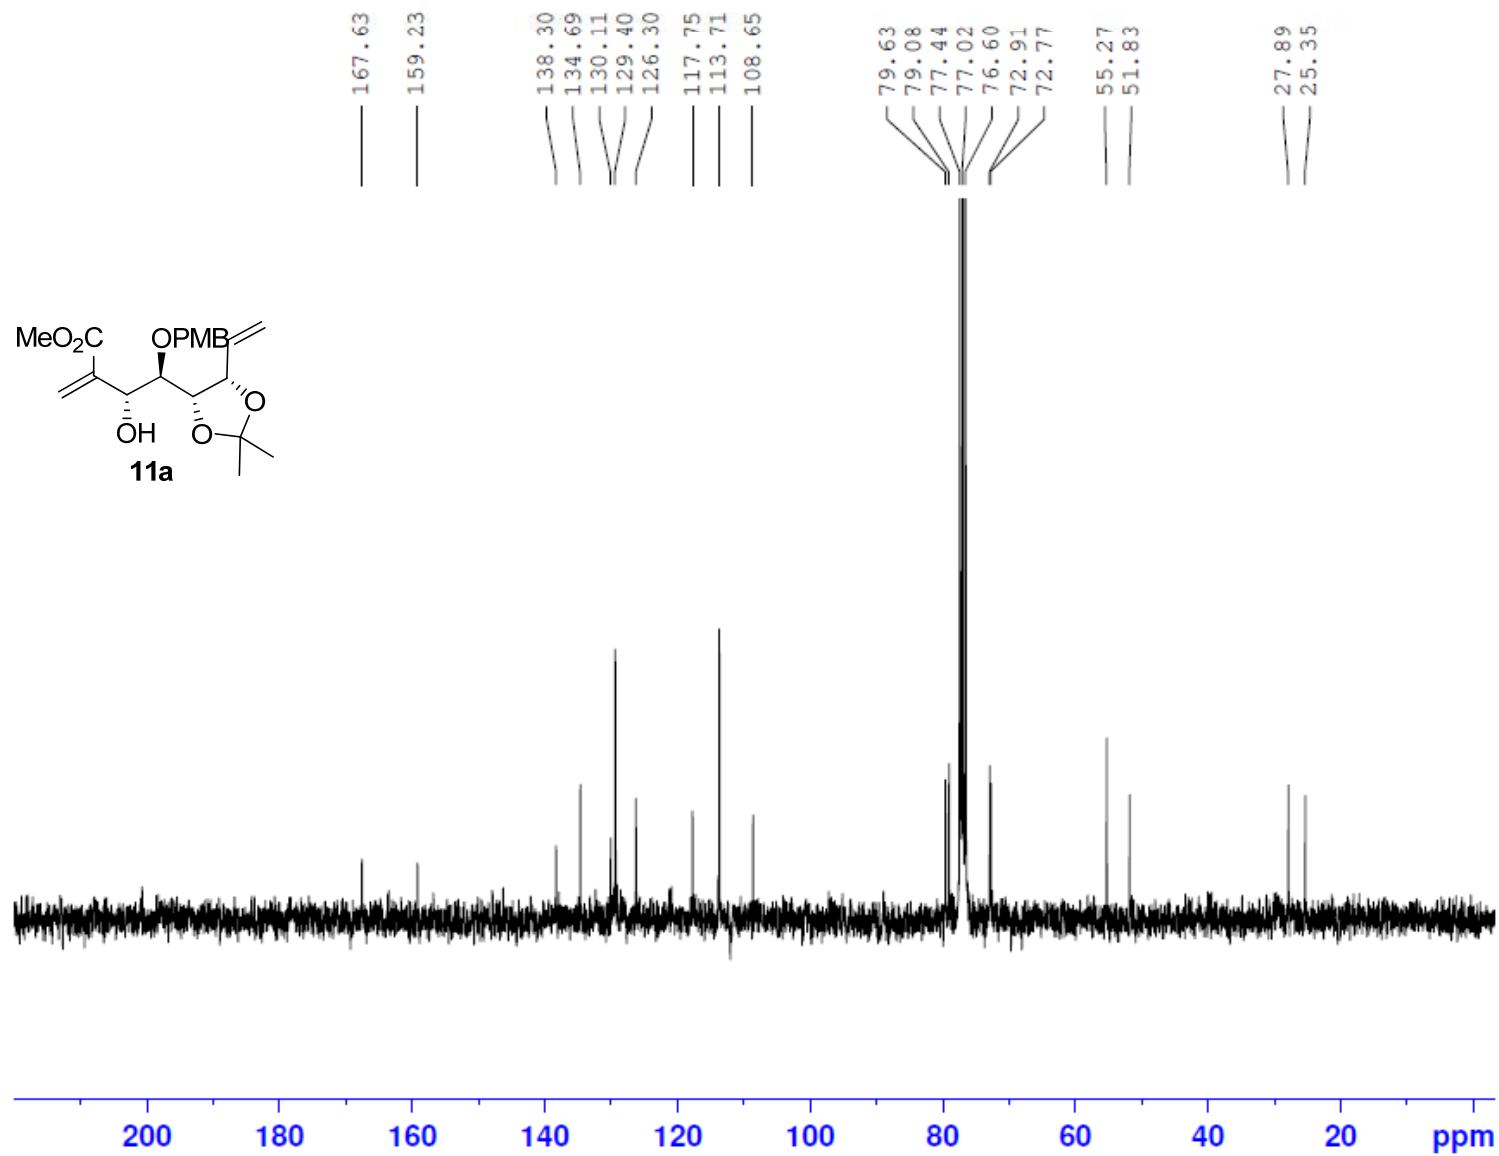

<sup>13</sup>C NMR (75 MHz CDCl<sub>3</sub>) of compound **11a**



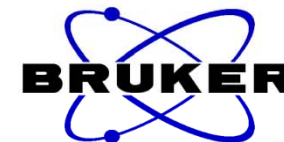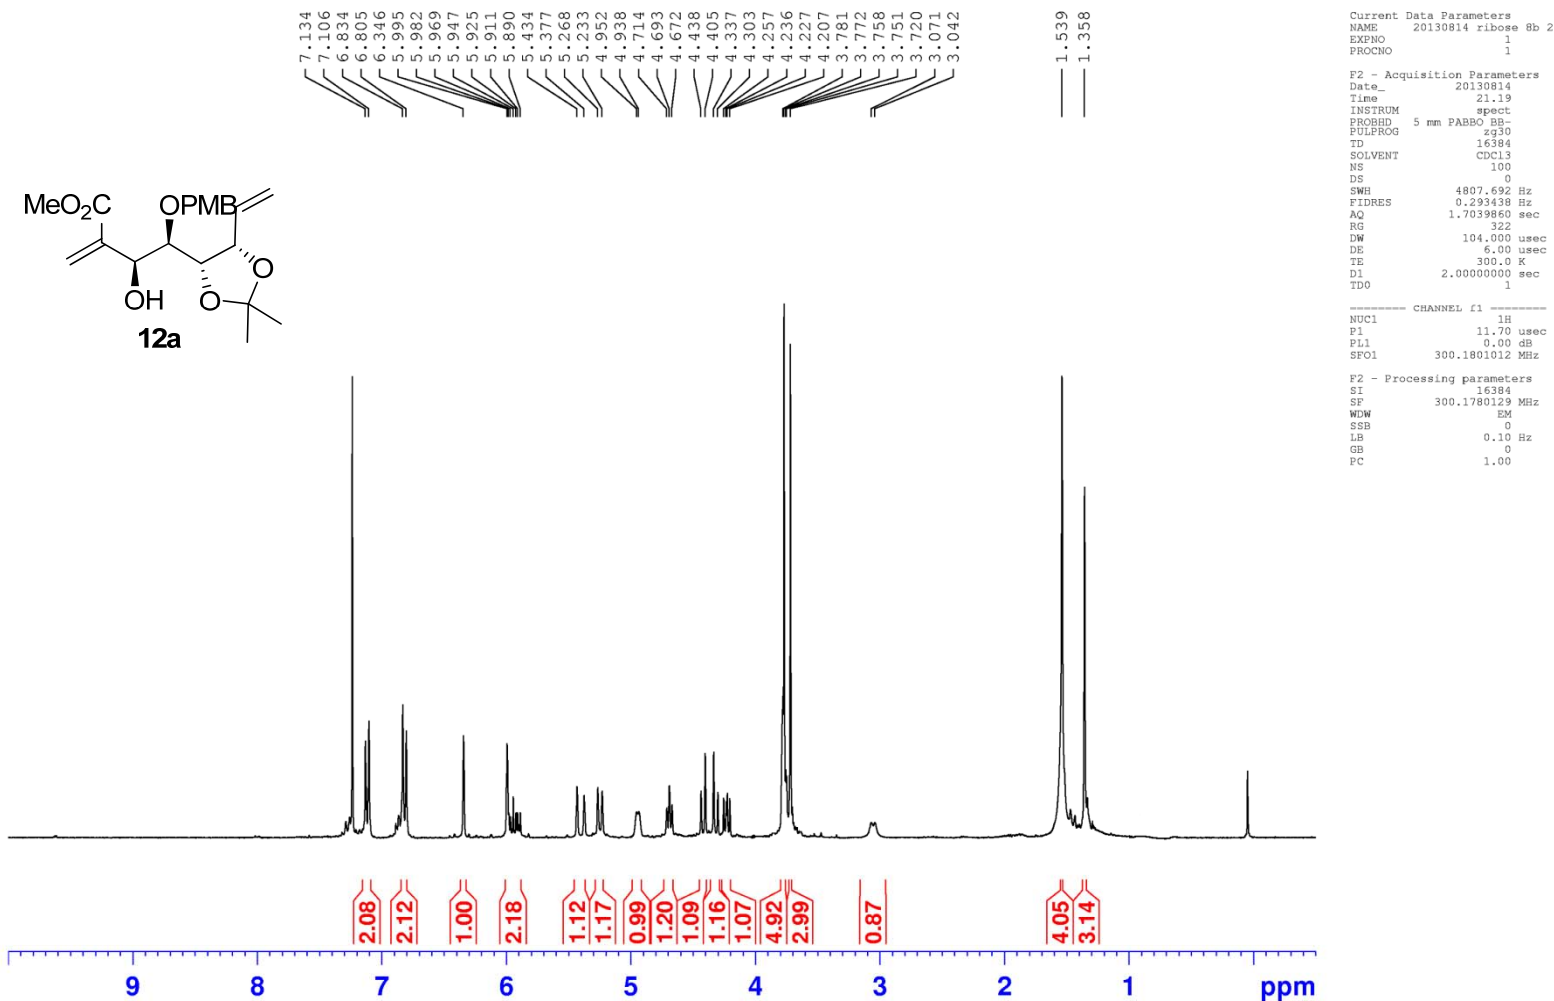

<sup>1</sup>H NMR (300 MHz CDCl<sub>3</sub>) of compound **12a**

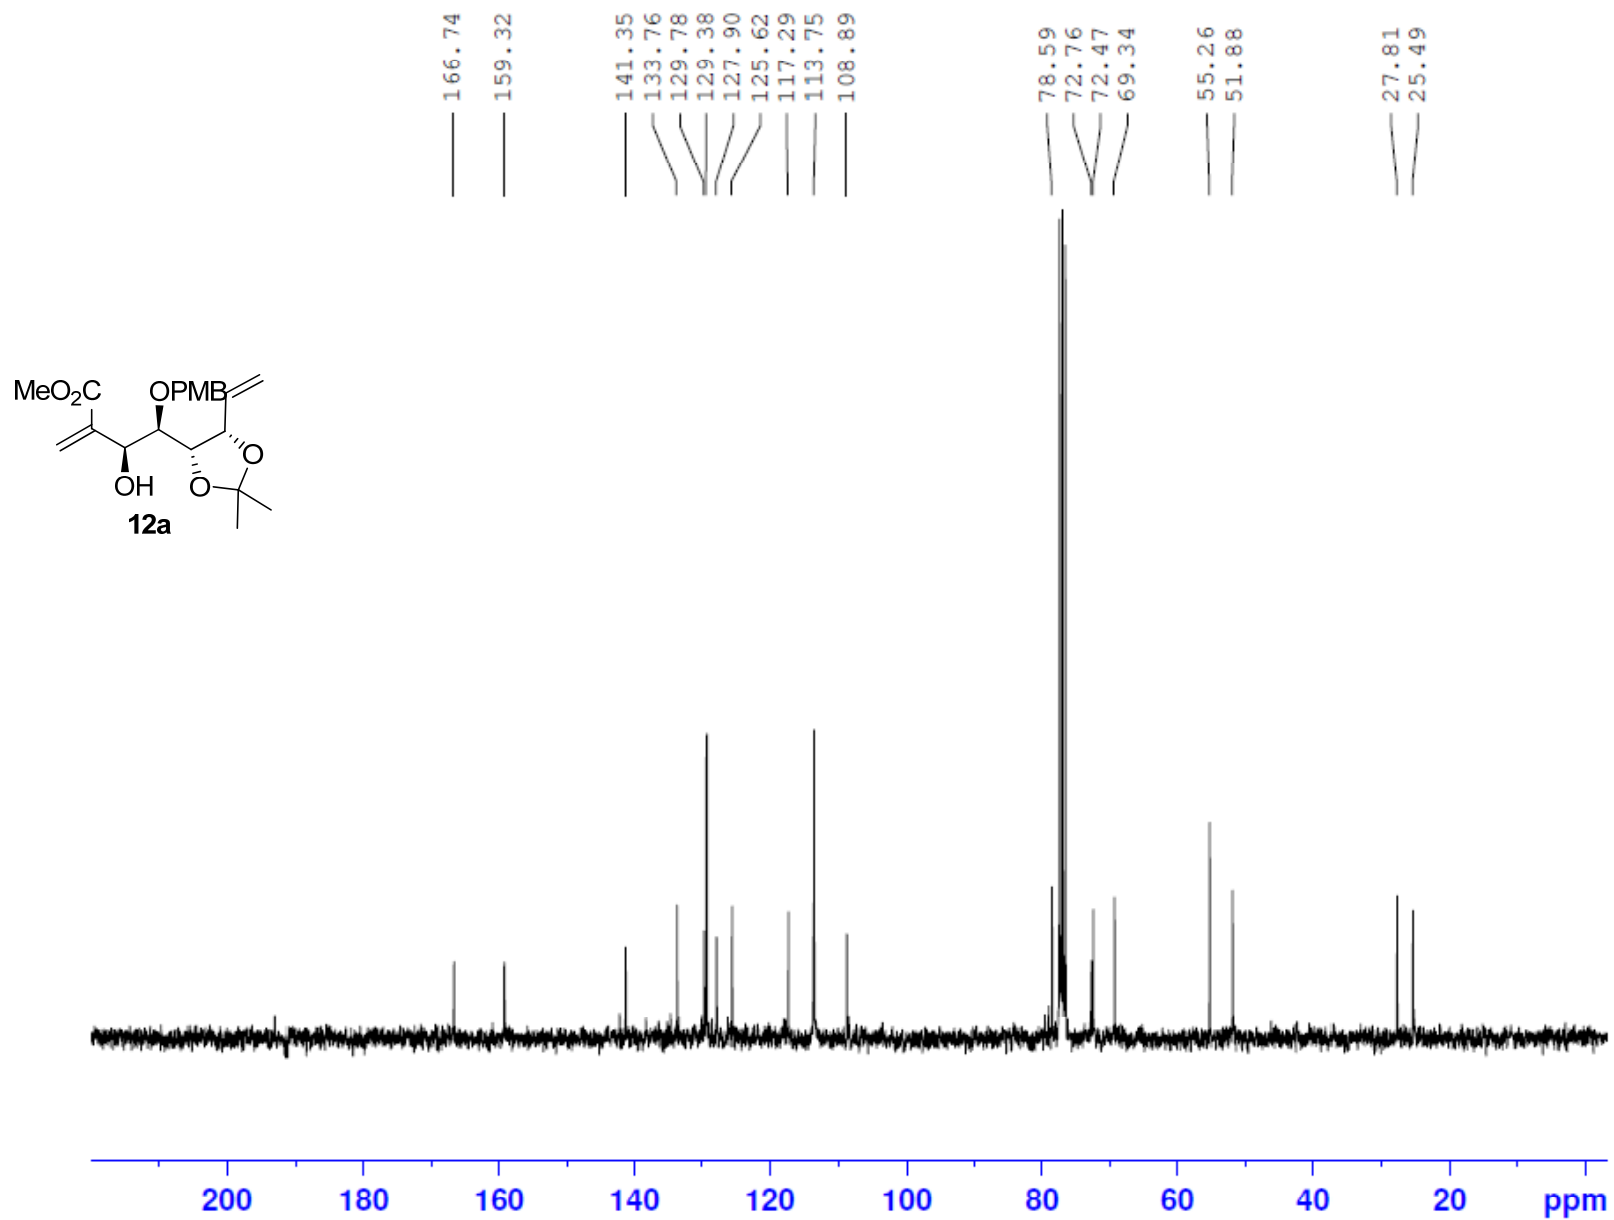

<sup>13</sup>C NMR (75 MHz CDCl<sub>3</sub>) of compound **12a**

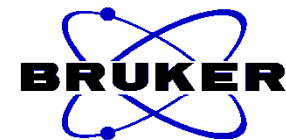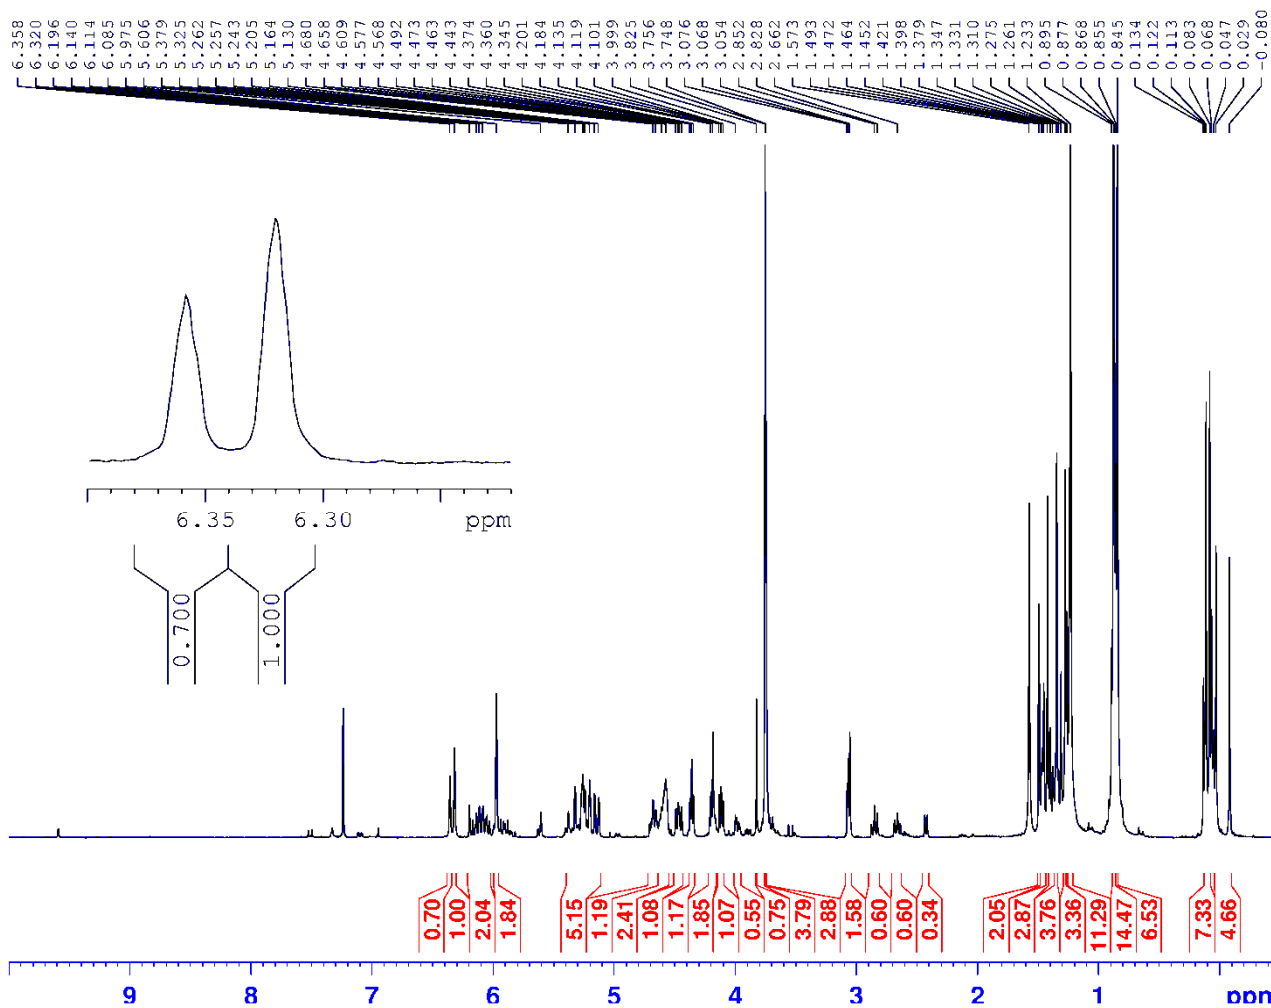

```

Current Data Parameters:
NAME: 20130809_10030809_10030809_10030809
EXPNO: 1
PROCNO: 1
F1: Acquisition Parameters
Date_Time: 20130809
Time: 22.05
INSTRUM: spect
PROBHD: 5 mm QNP5-1
PULPROG: zgpg30
SOLVENT: CDCl3
NS: 2048
DS: 4
AQ: 1.963966 sec
RG: 384
AQ: 0.133425 Hz
RG: 1.963966 sec
PC: 1.00
PC: 164.000 usec
PC: 2.00 usec
PC: 150.00 K
PC: 1.00000000 sec
===== CHANNEL f1 =====
NUC1: 13C
P1: 17.000 usec
PC1: 0.00 db
PC1: 200.1400000 MHz
F2 - Processing parameters
PC: 164.000 MHz
PC: 350.1350120 MHz
PC: 1.00
PC: 0.00 Hz
PC: 1.00
PC: 1.00
    
```

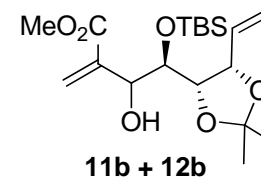

<sup>1</sup>H NMR (300 MHz CDCl<sub>3</sub>) of compound **11b + 12b**

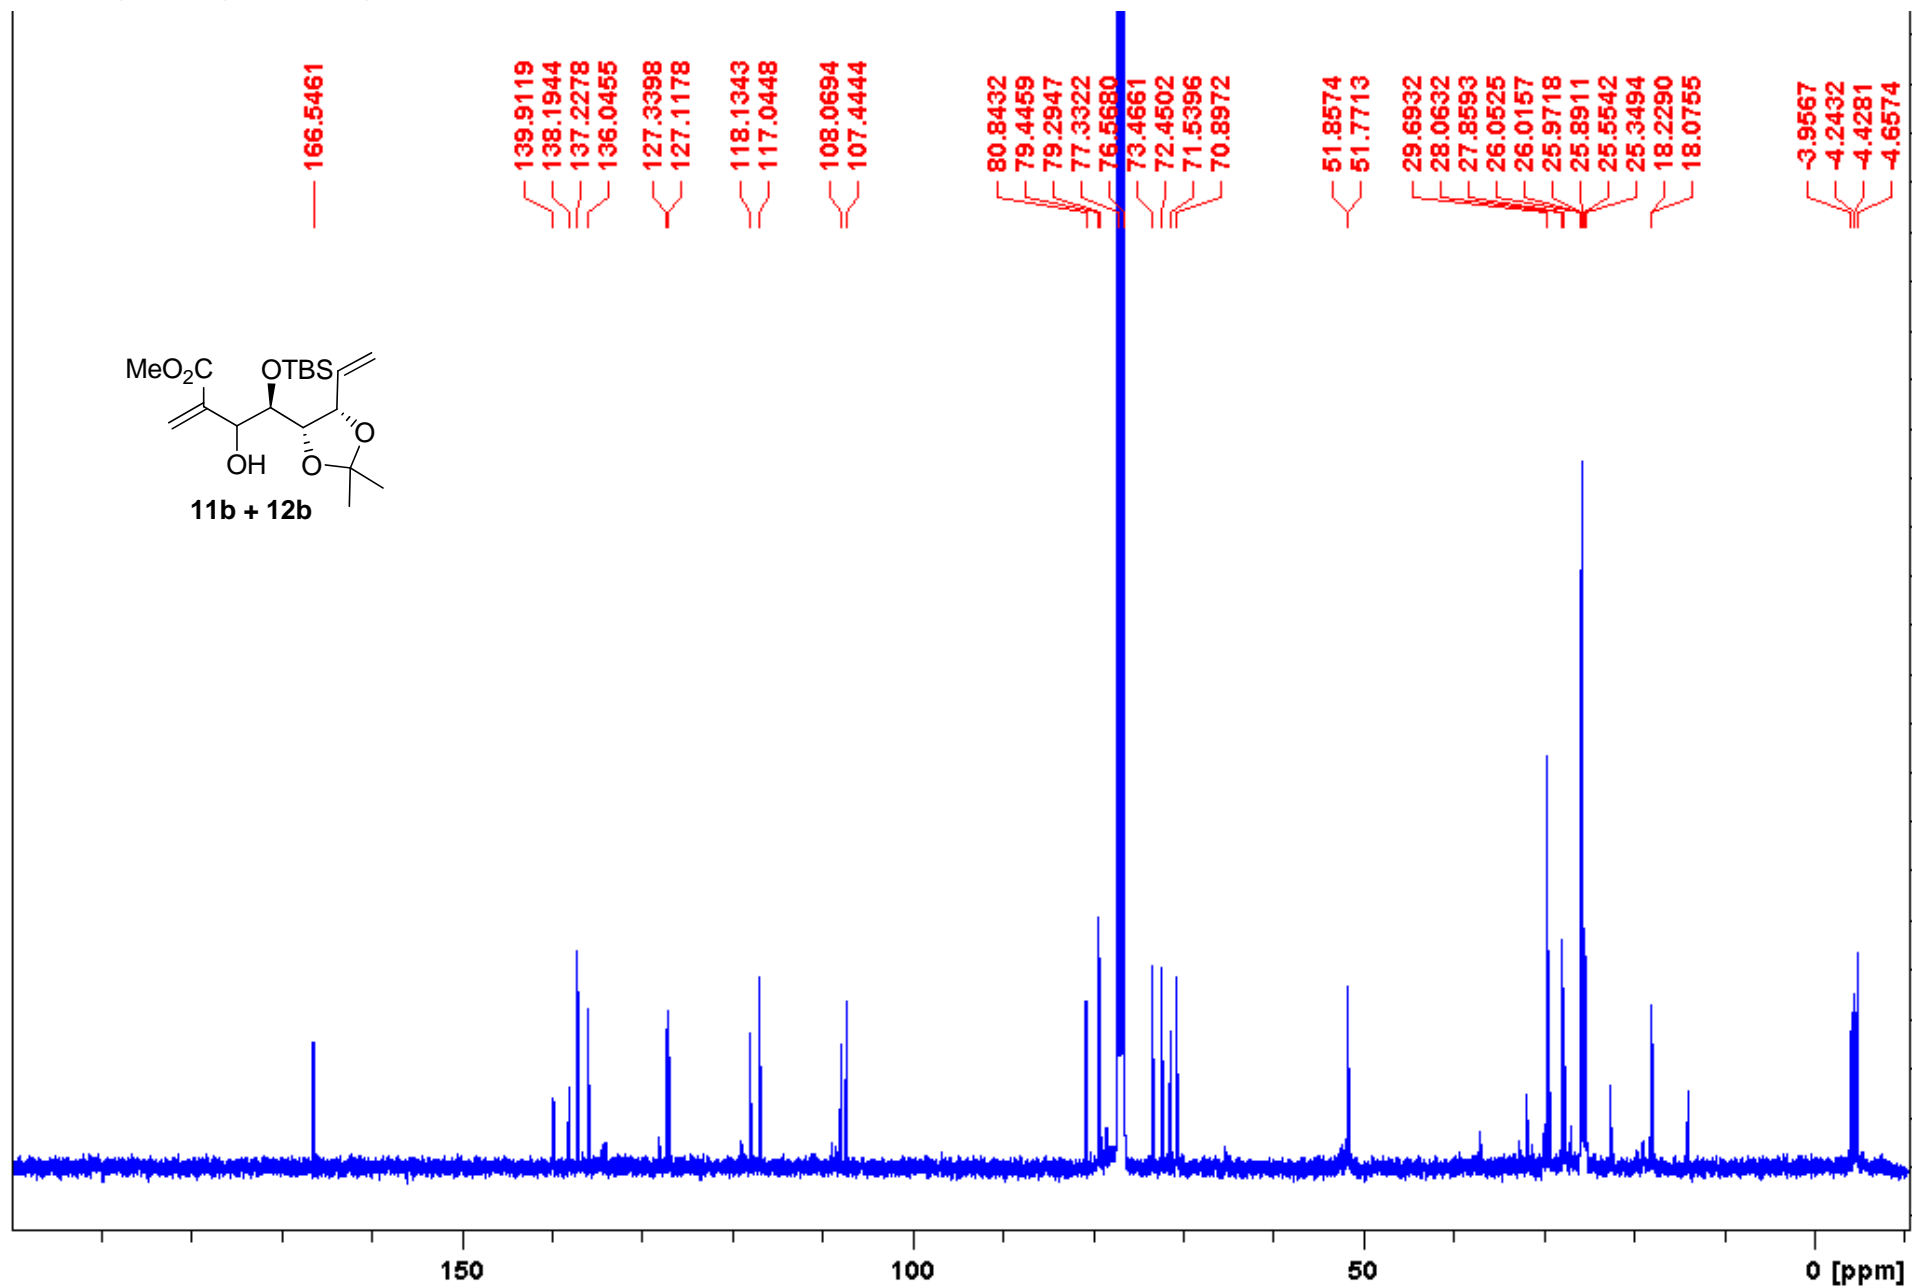

<sup>13</sup>C NMR (75 MHz CDCl<sub>3</sub>) of compound **11b + 12b**

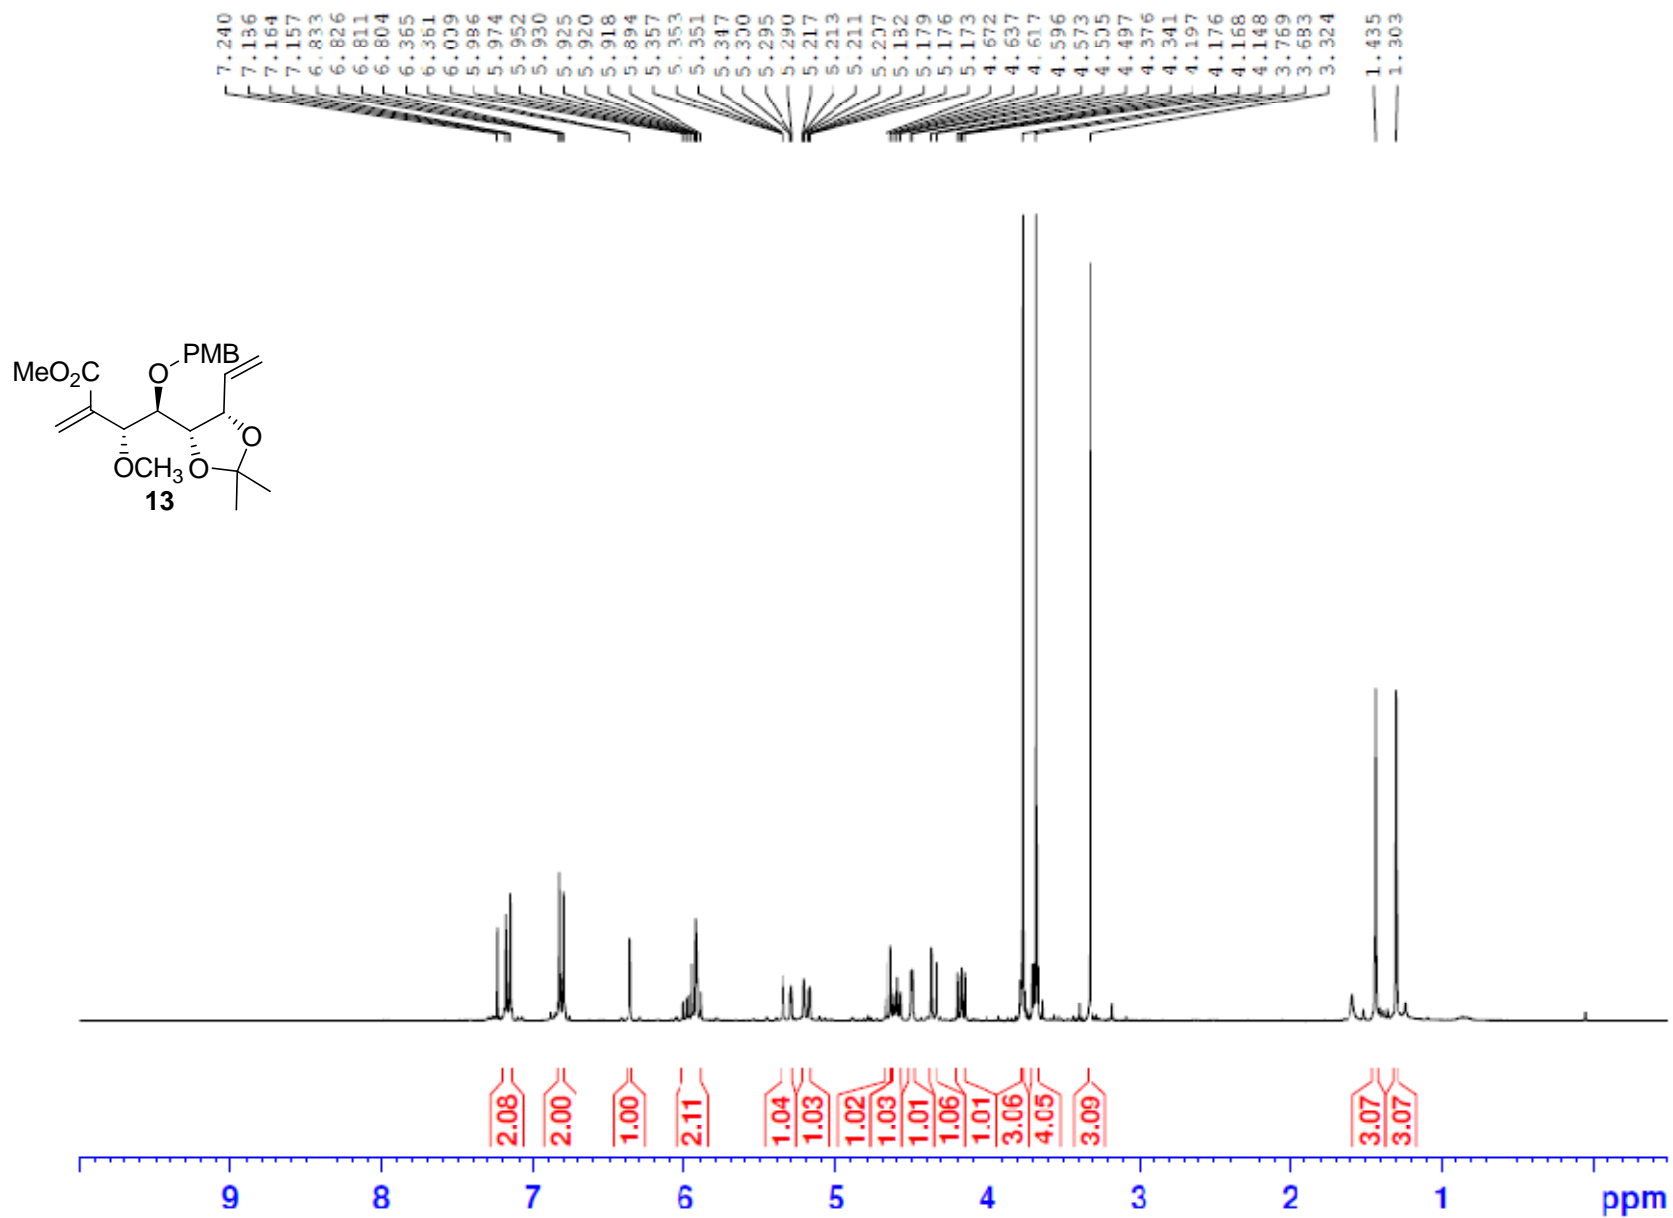

<sup>1</sup>H NMR (300 MHz CDCl<sub>3</sub>) of compound **13**

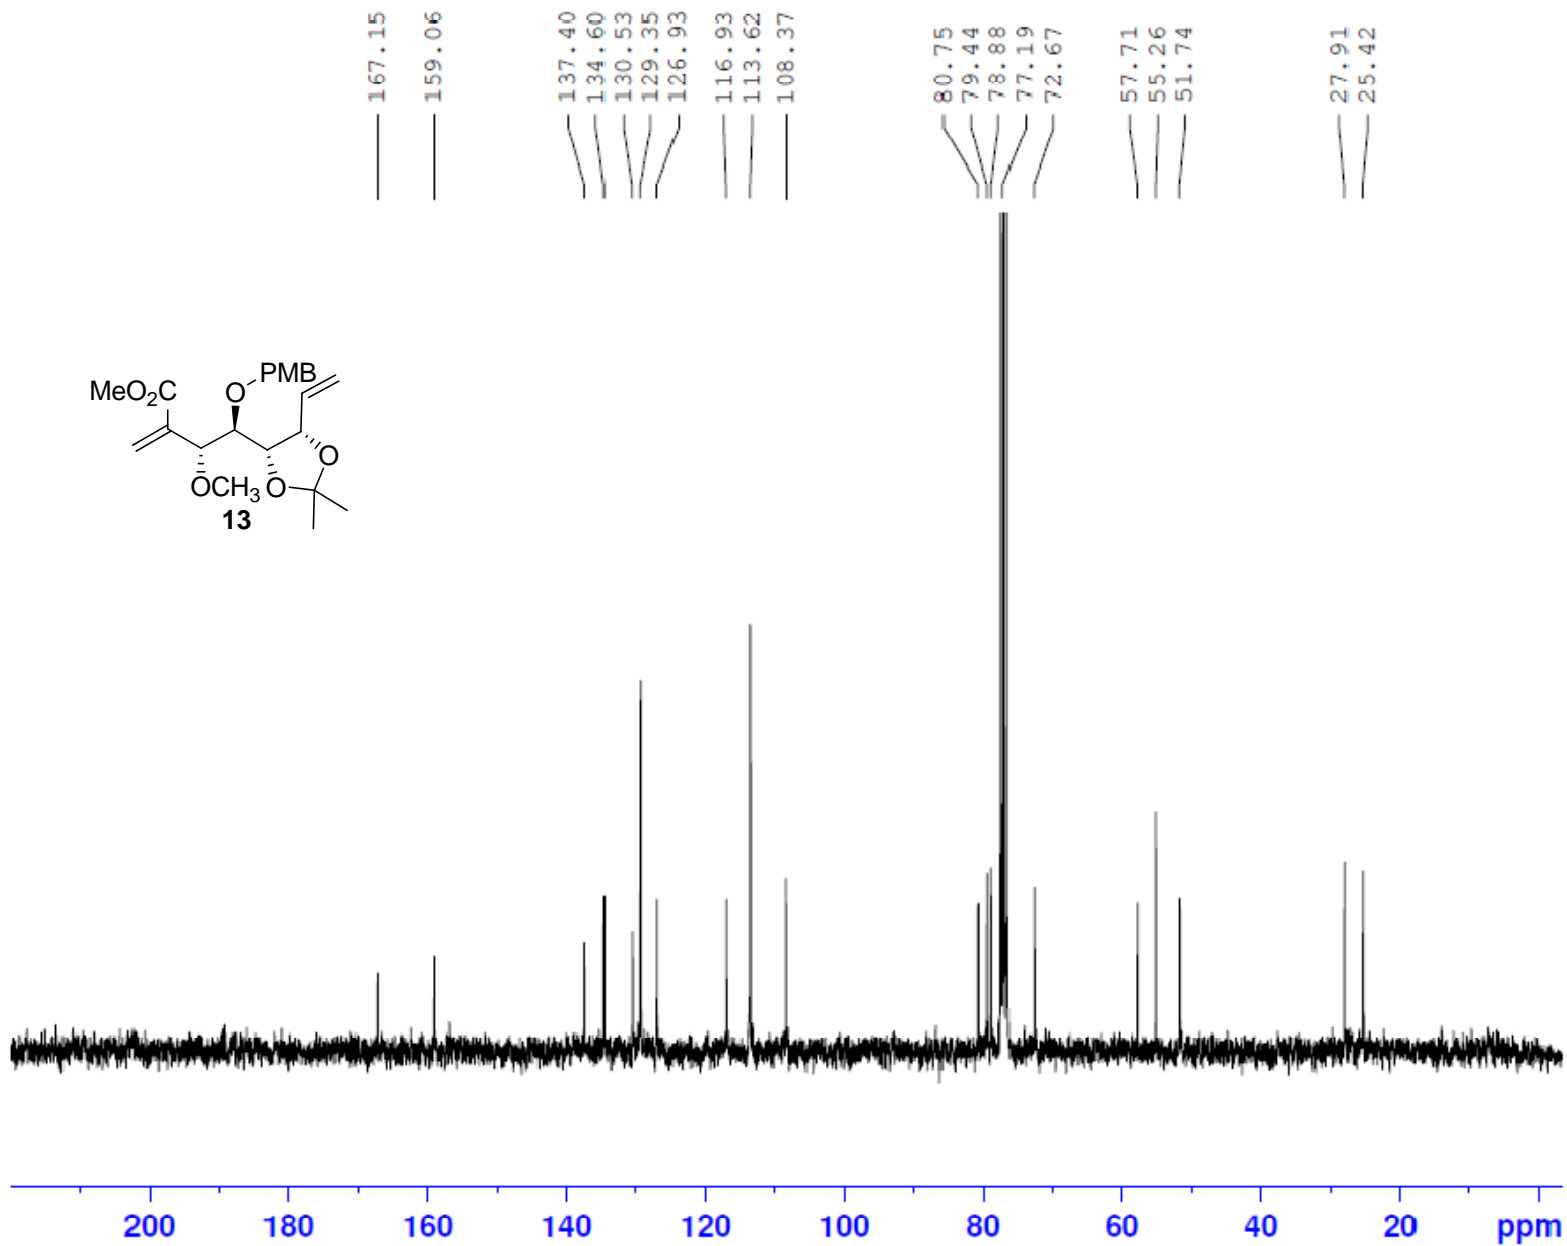

<sup>13</sup>C NMR (75 MHz CDCl<sub>3</sub>) of compound **13**

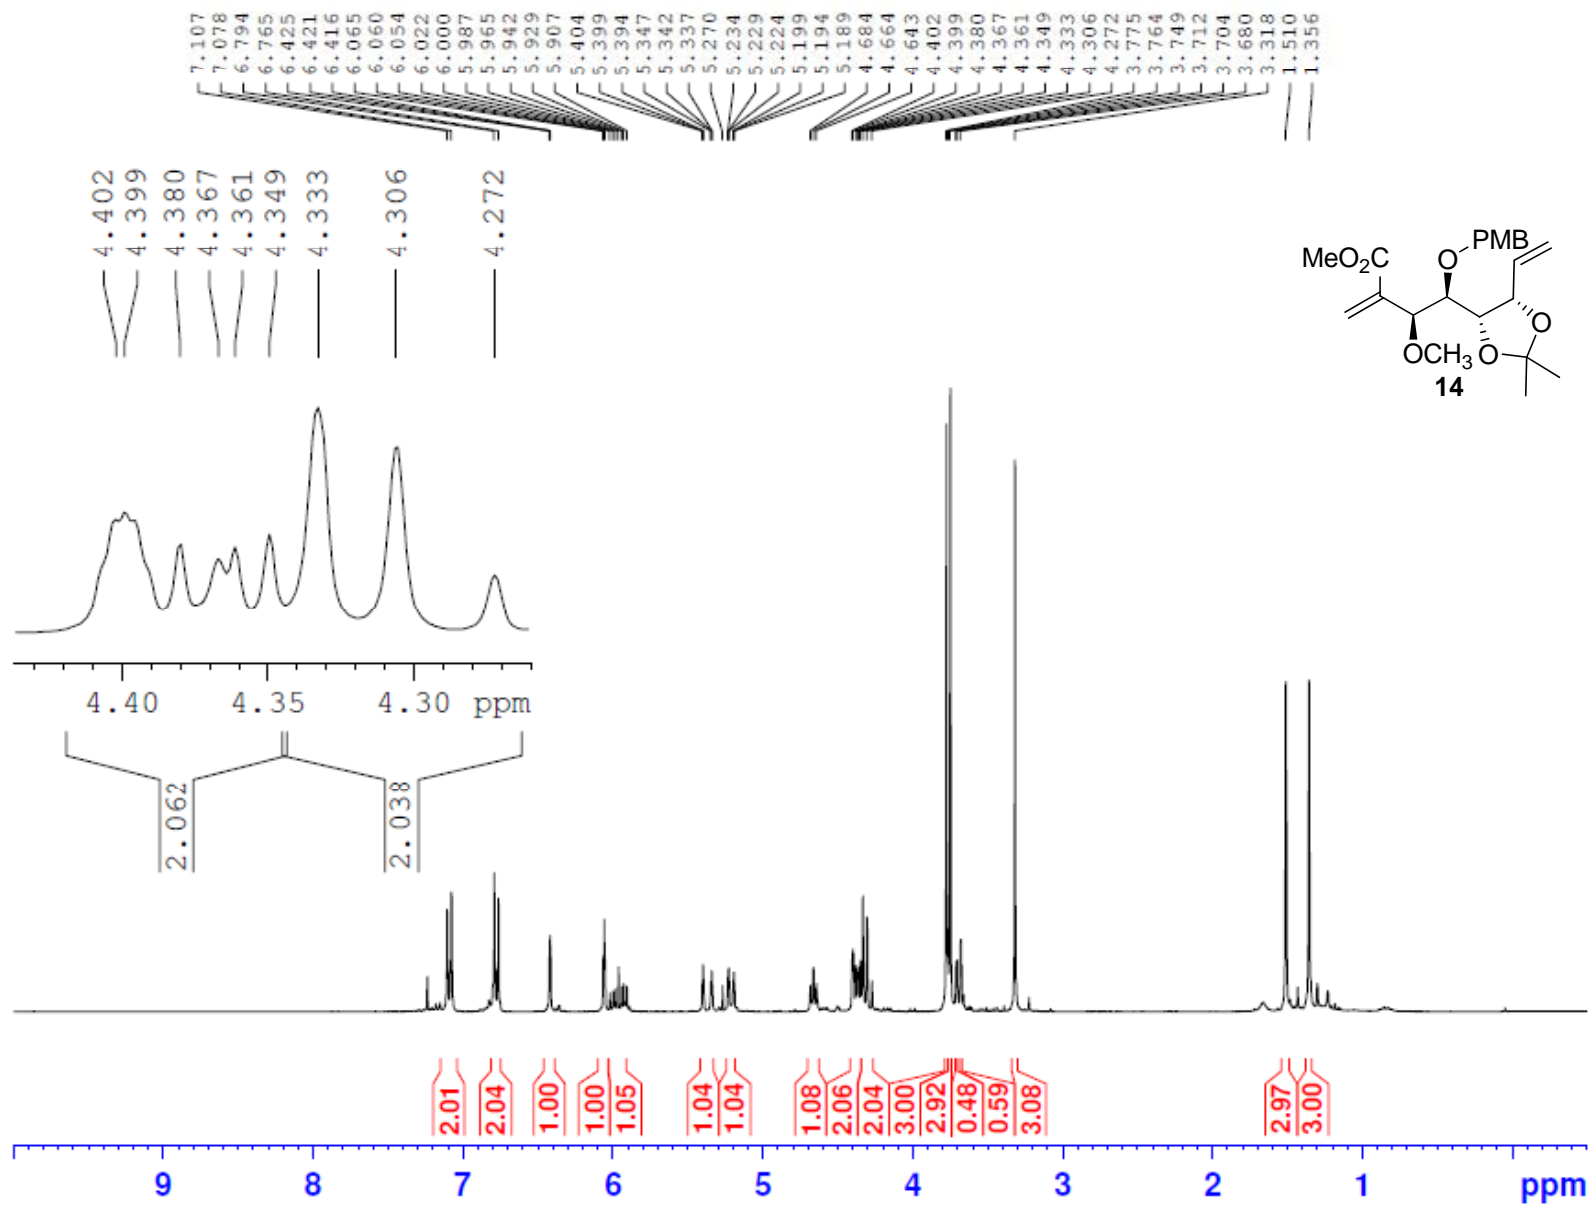

**<sup>1</sup>H NMR (300 MHz CDCl<sub>3</sub>) of compound 14**

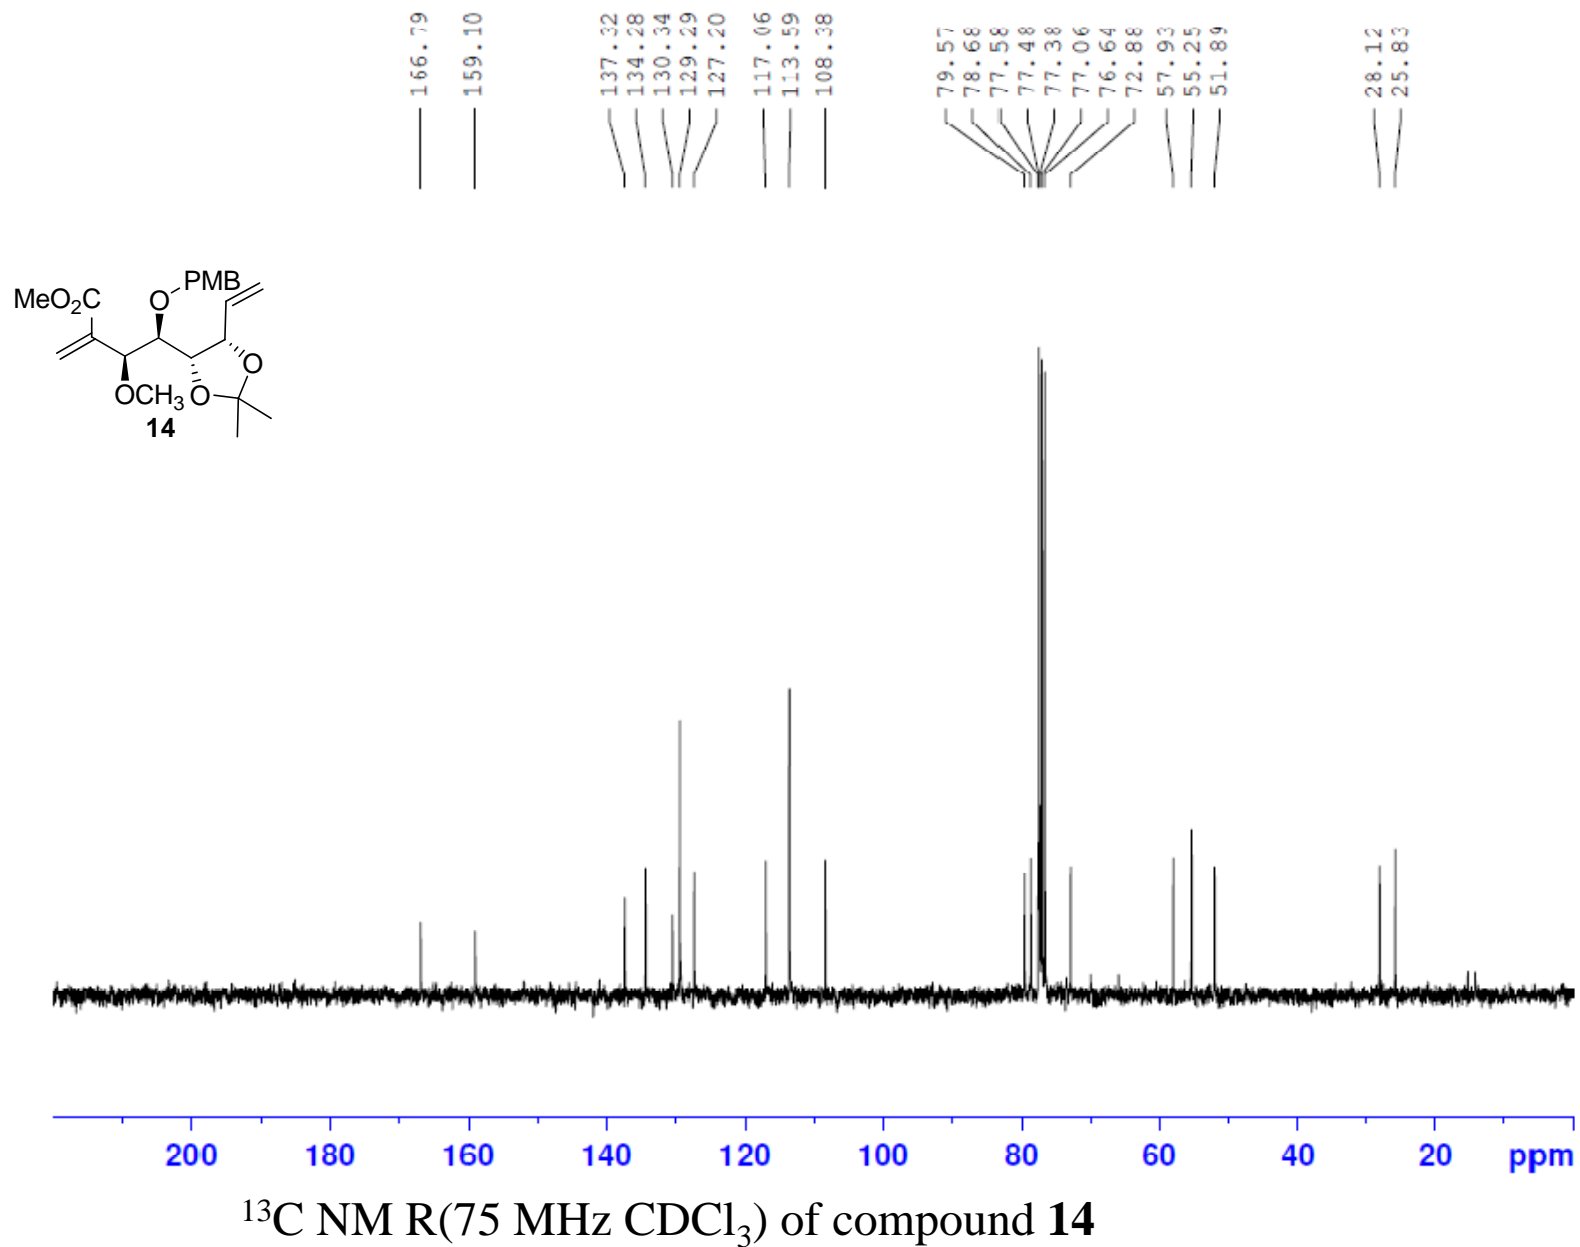



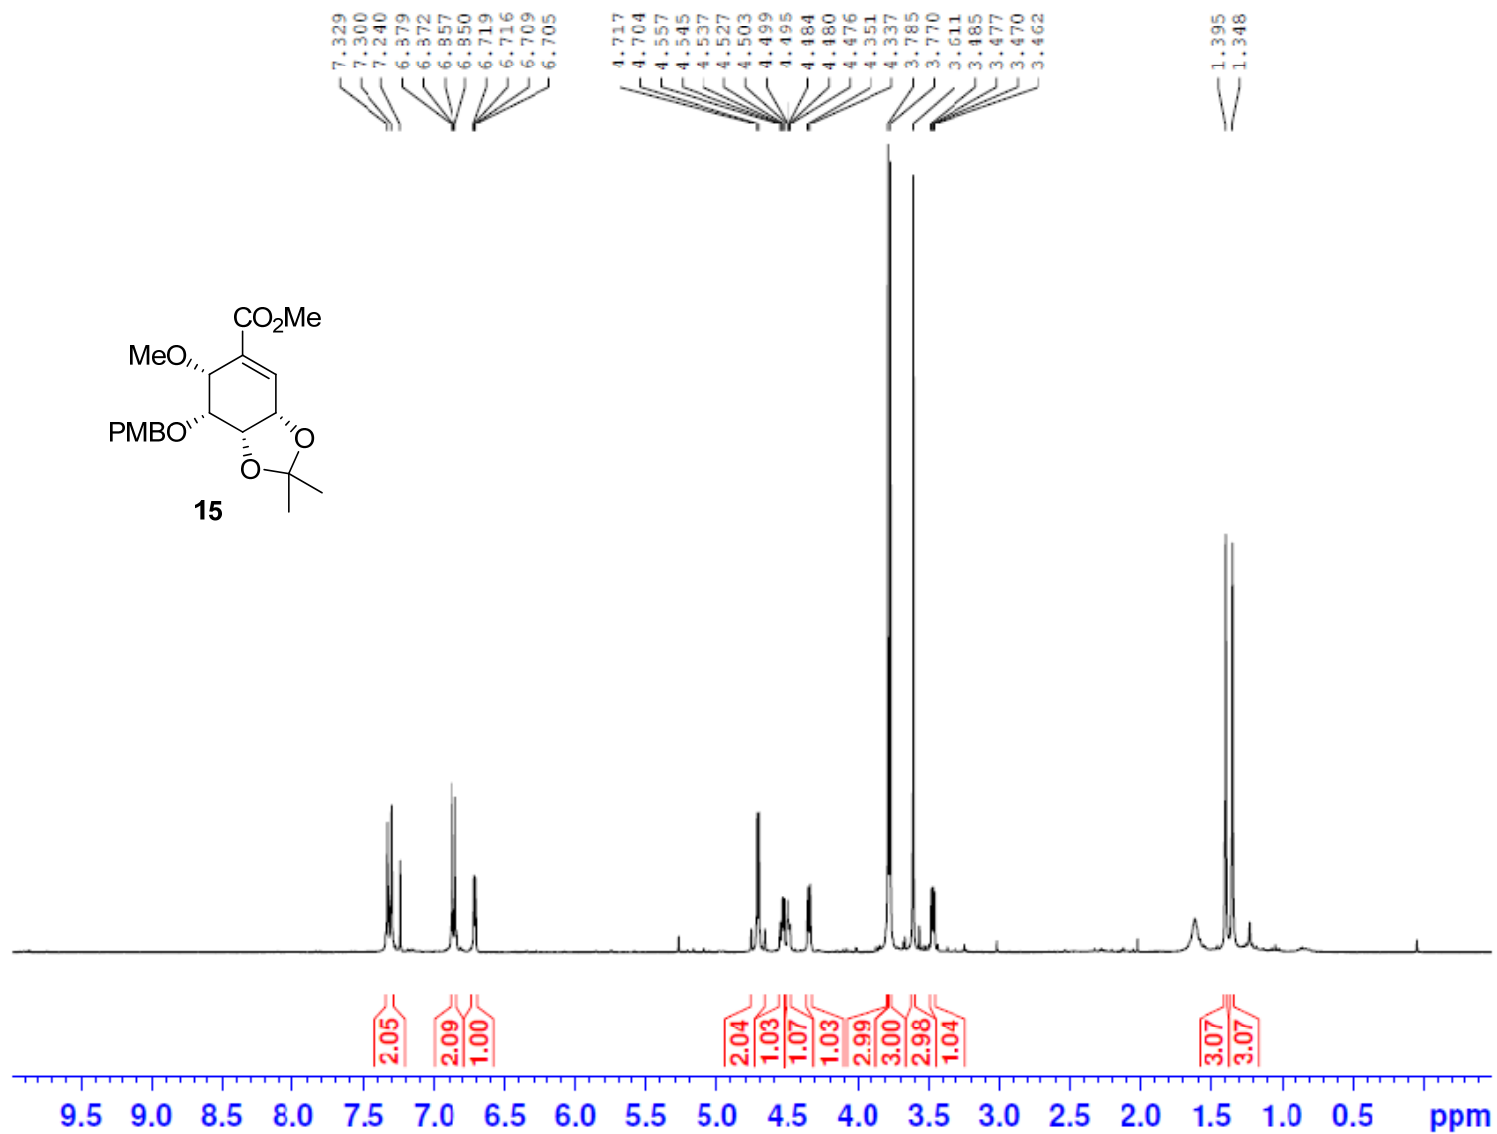

<sup>1</sup>H NMR (300 MHz CDCl<sub>3</sub>) of compound **15**

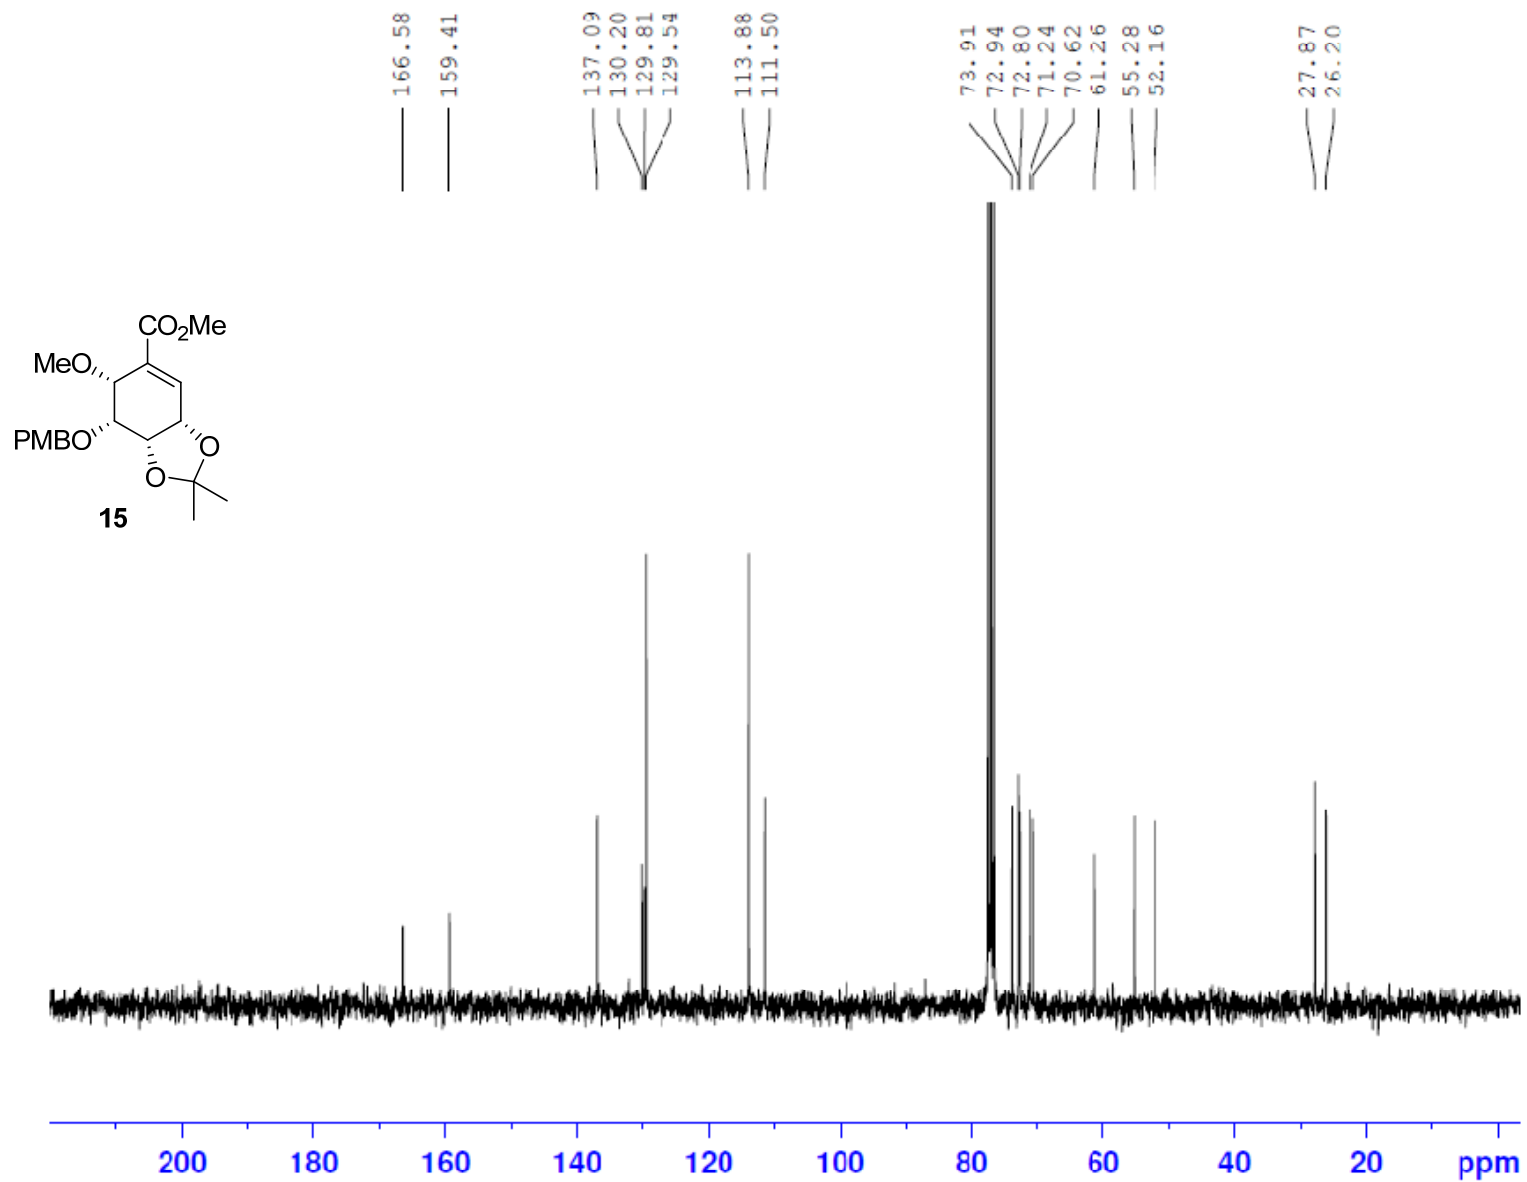

<sup>13</sup>C NMR (75 MHz CDCl<sub>3</sub>) of compound **15**

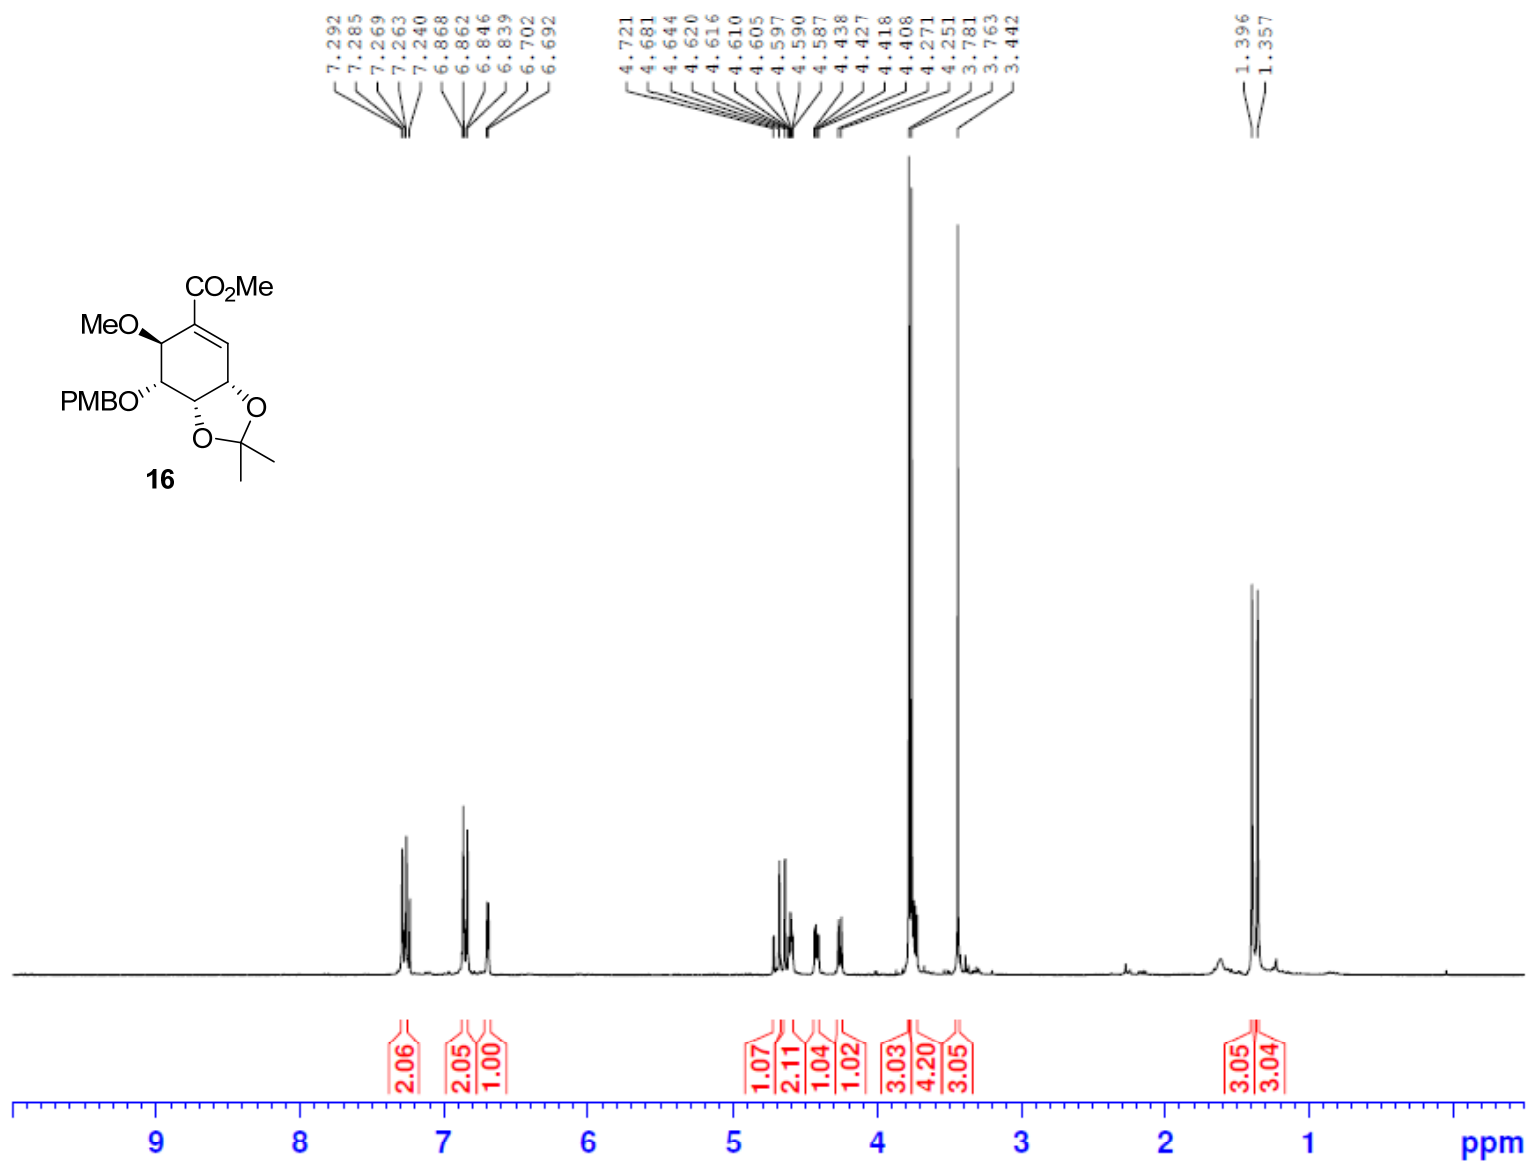

<sup>1</sup>H NMR (300 MHz CDCl<sub>3</sub>) compound **16**

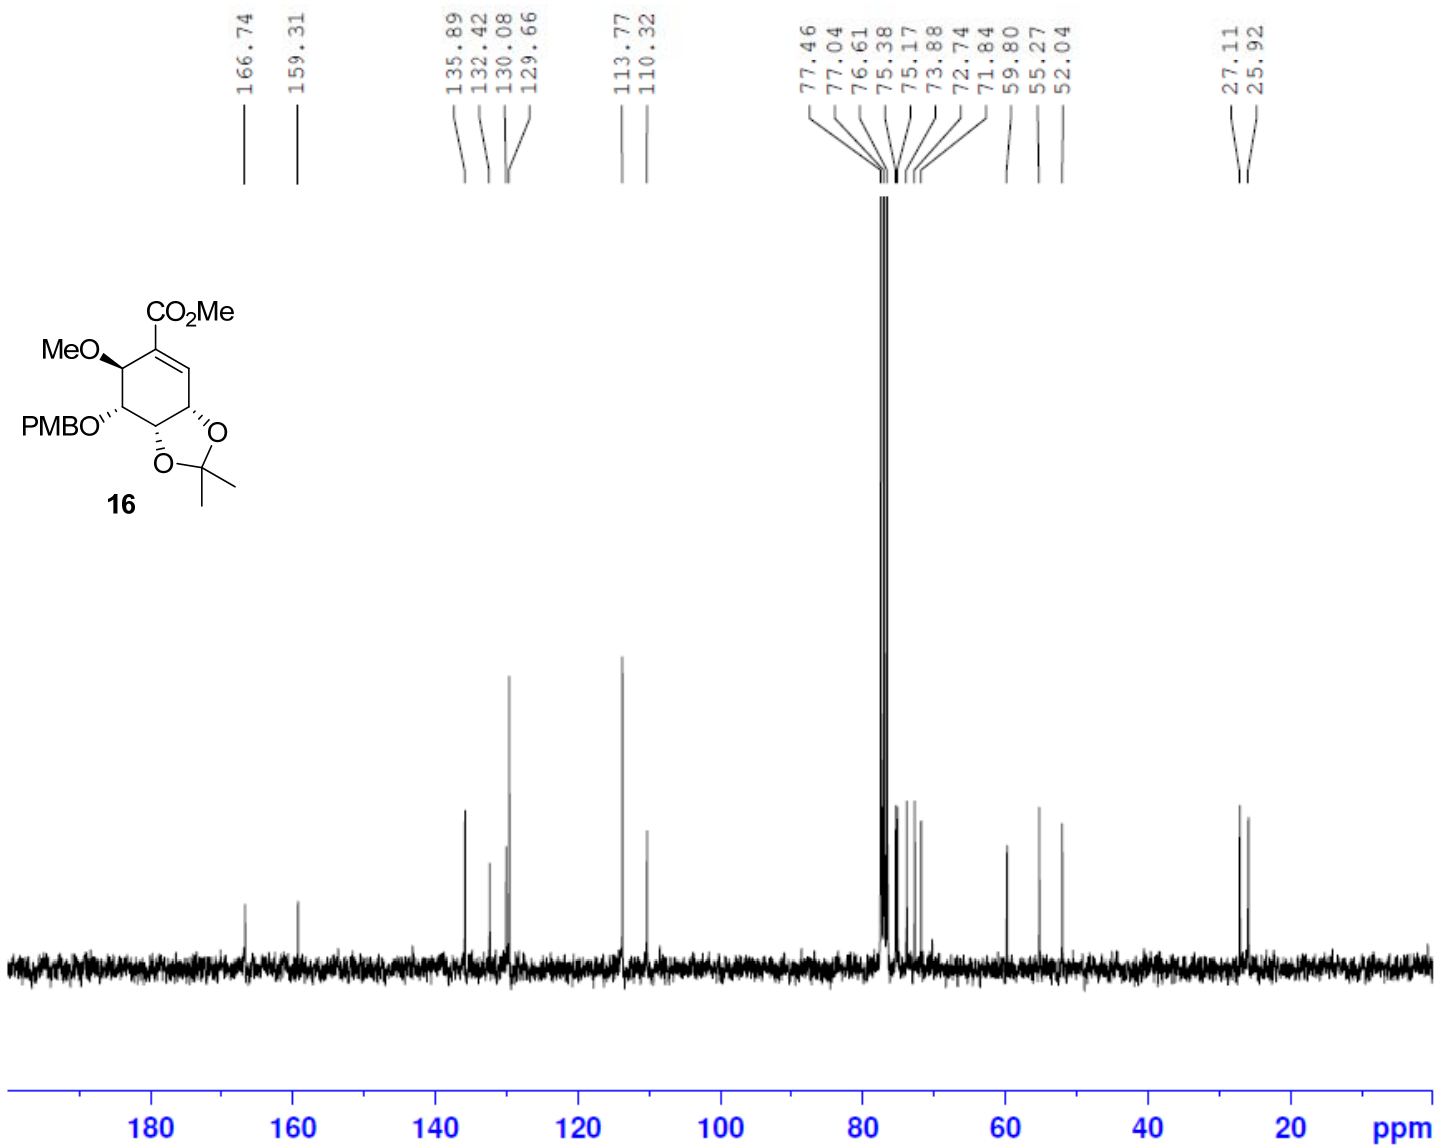

<sup>13</sup>C NMR (75 MHz CDCl<sub>3</sub>) compound **16**

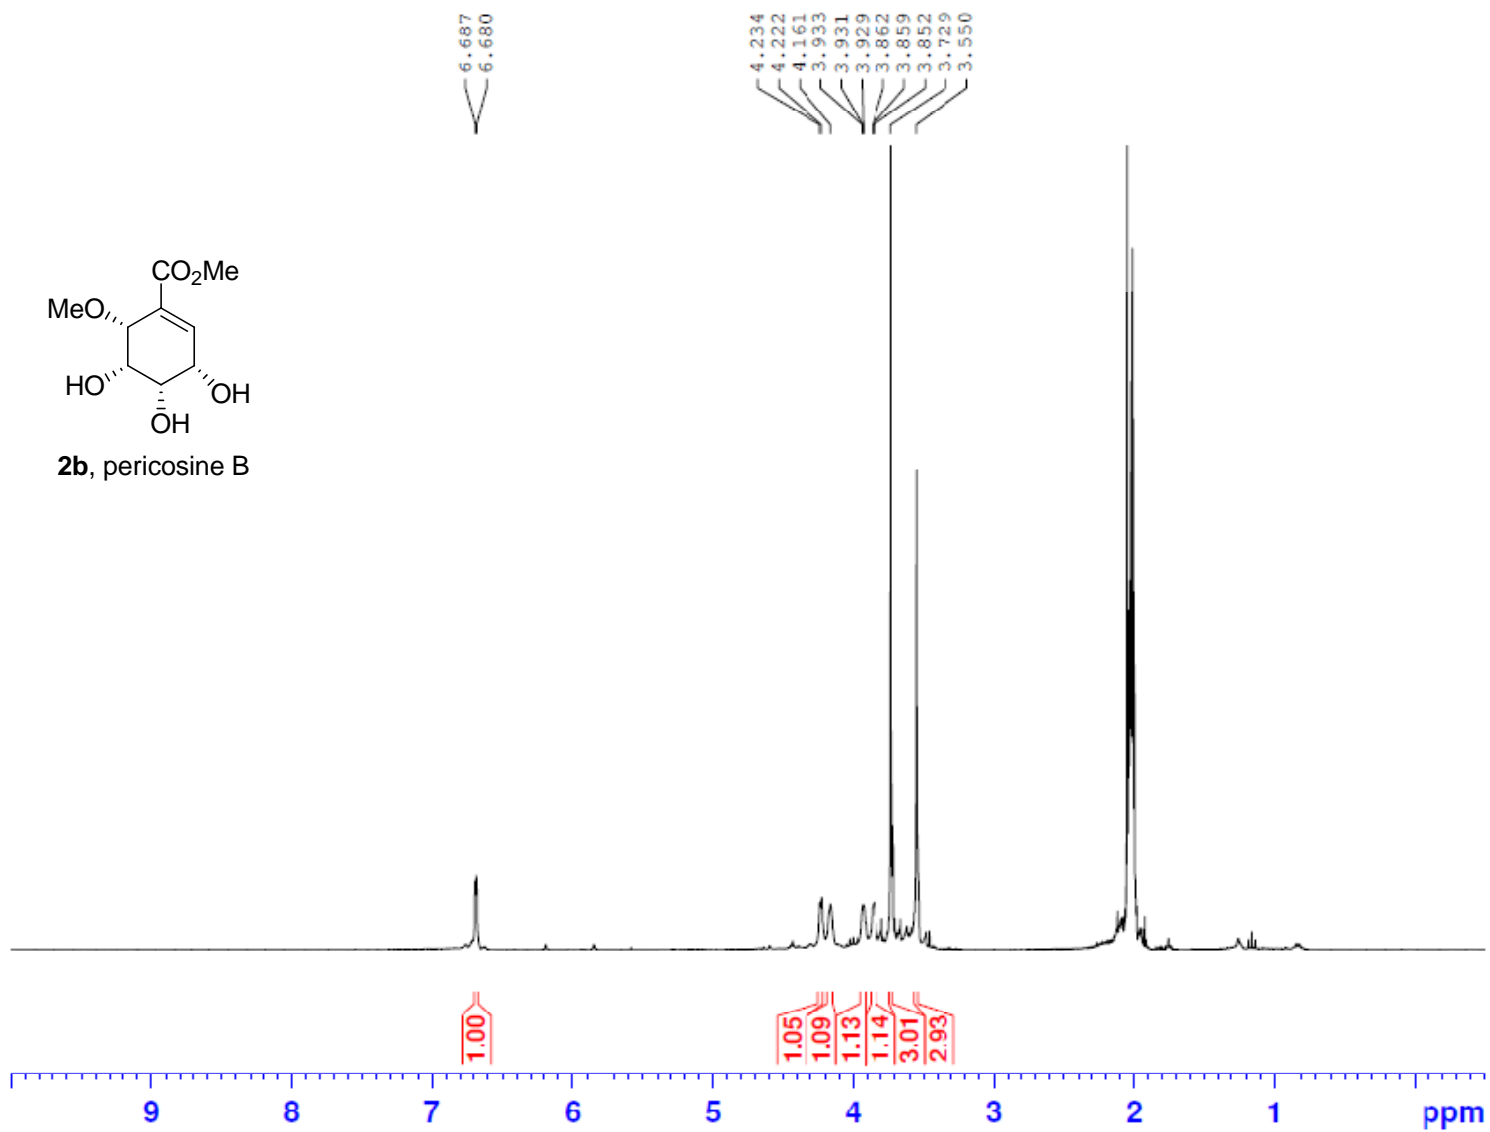

<sup>1</sup>H NMR (300 MHz, acetone-d<sub>6</sub>) compound **2b**

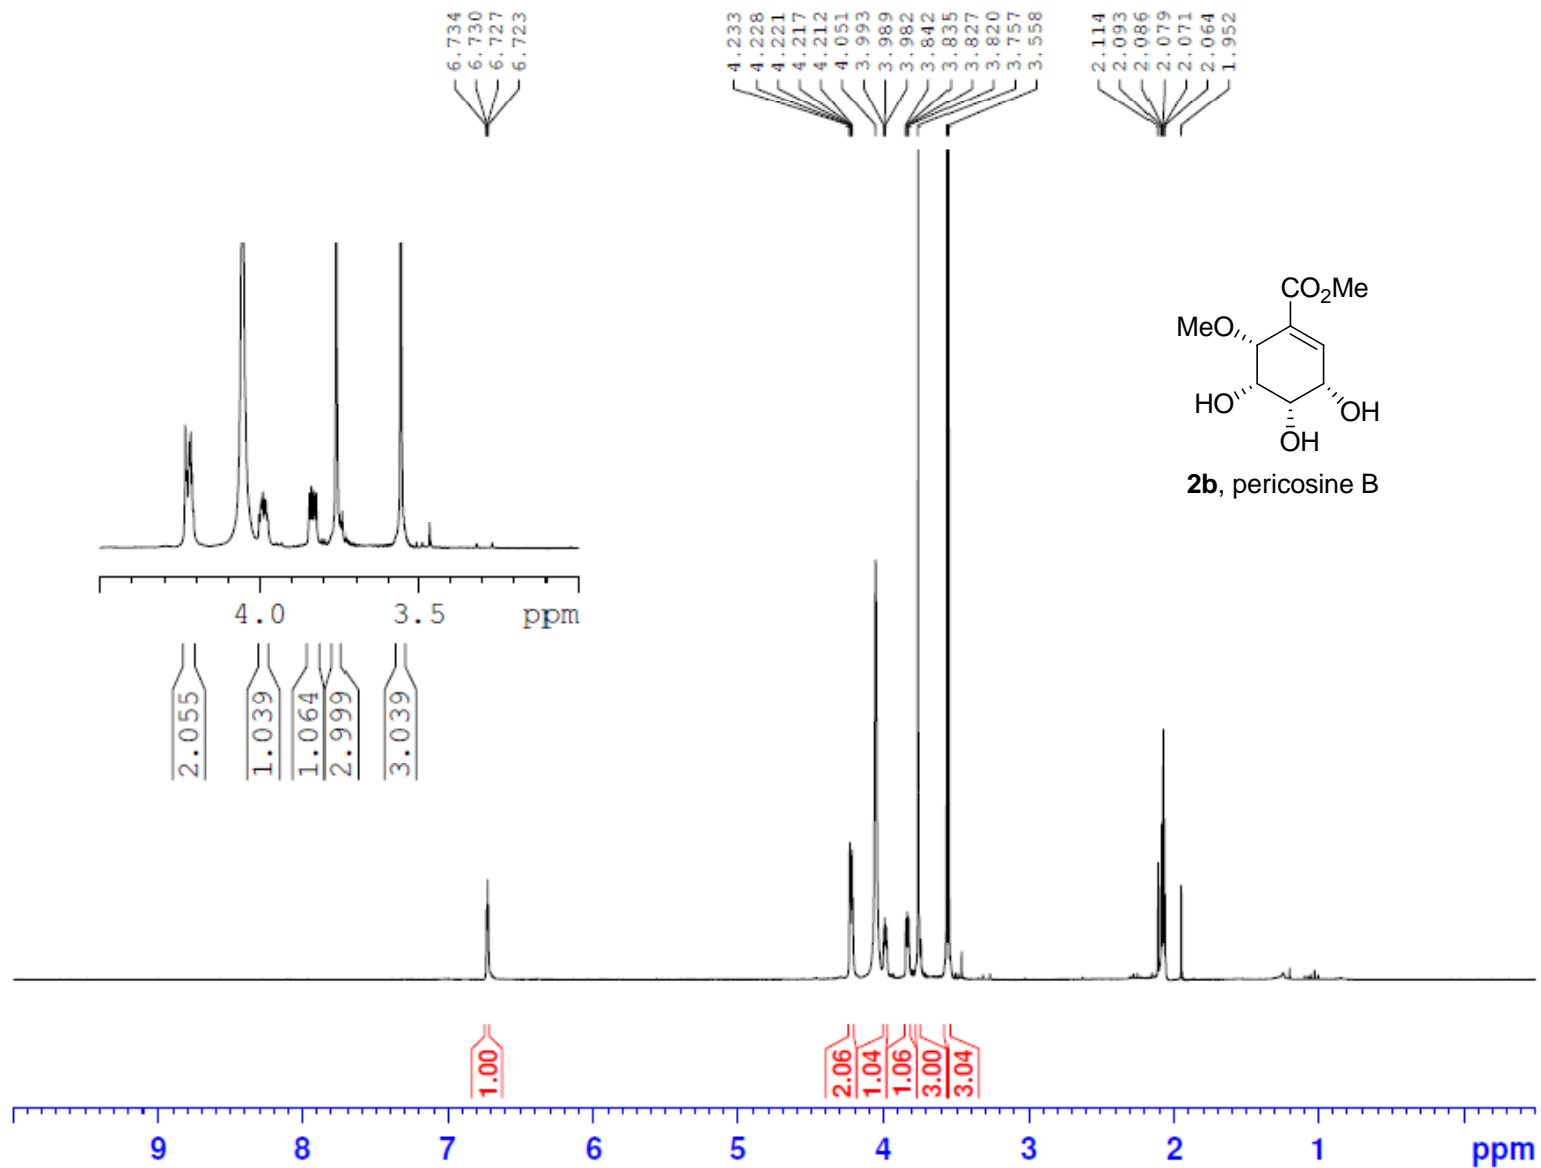

<sup>1</sup>H NMR (300 MHz, acetone-d<sub>6</sub>/D<sub>2</sub>O) compound **2b**

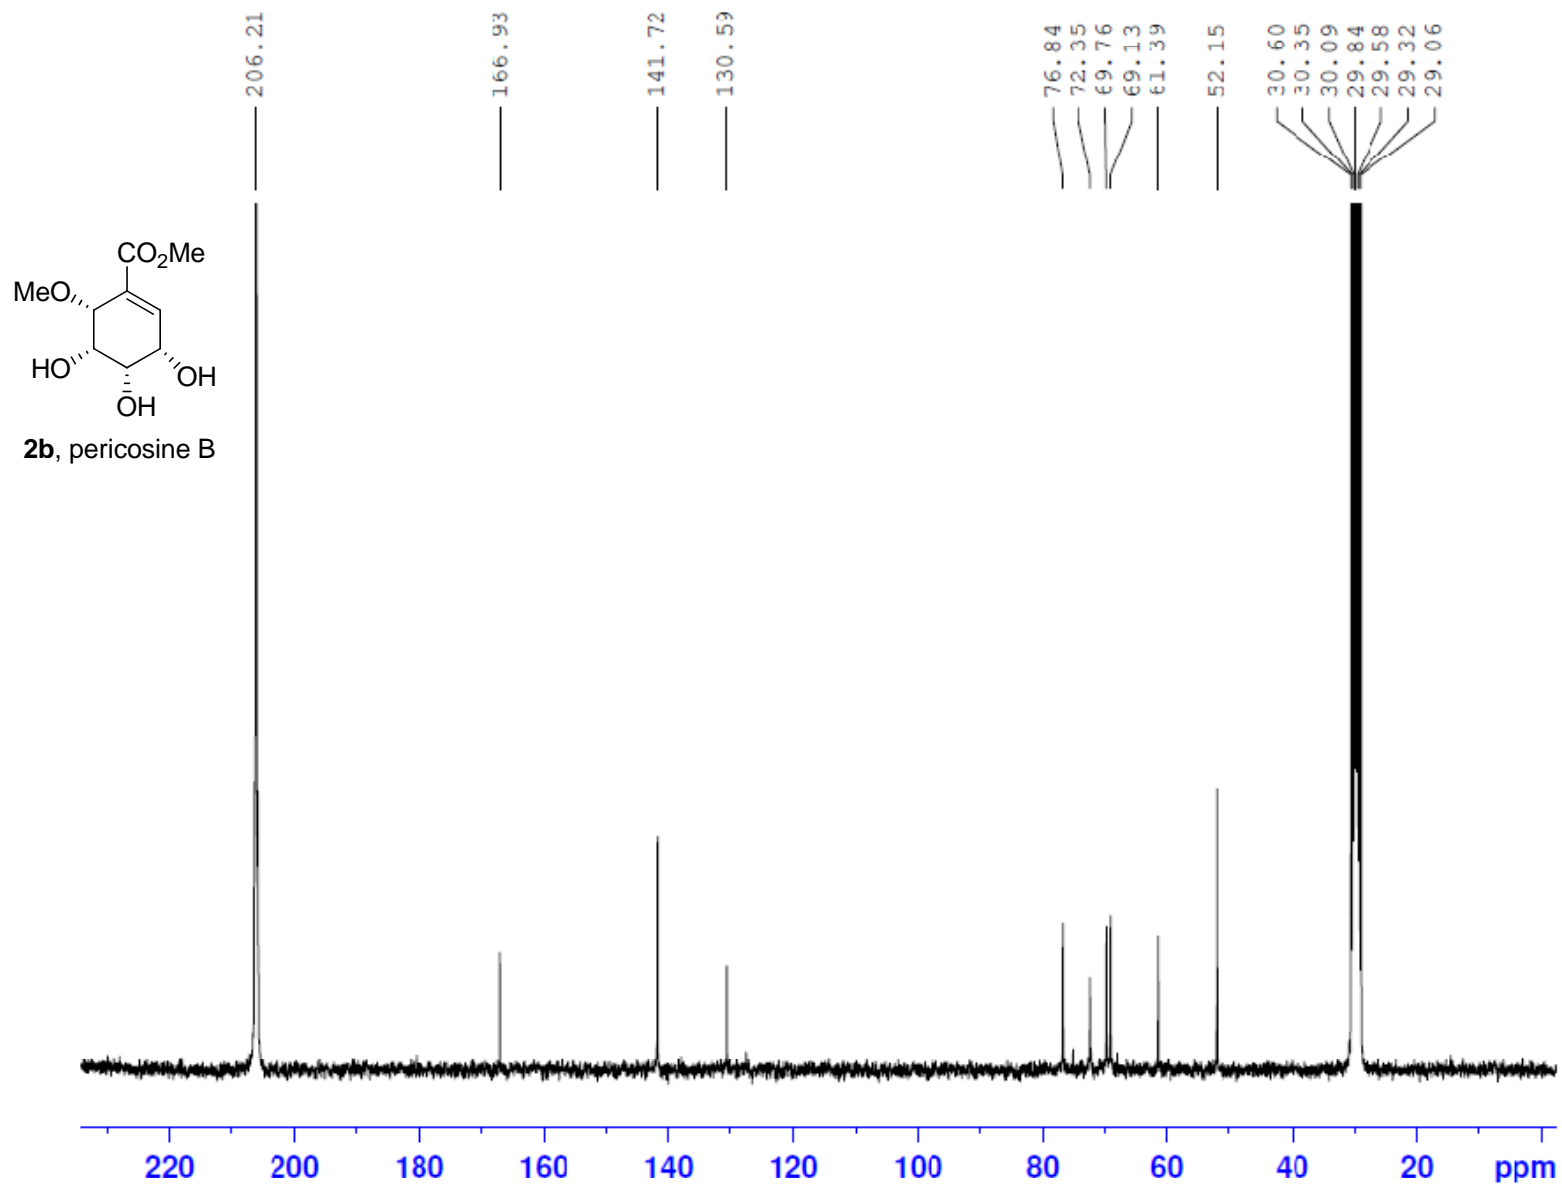

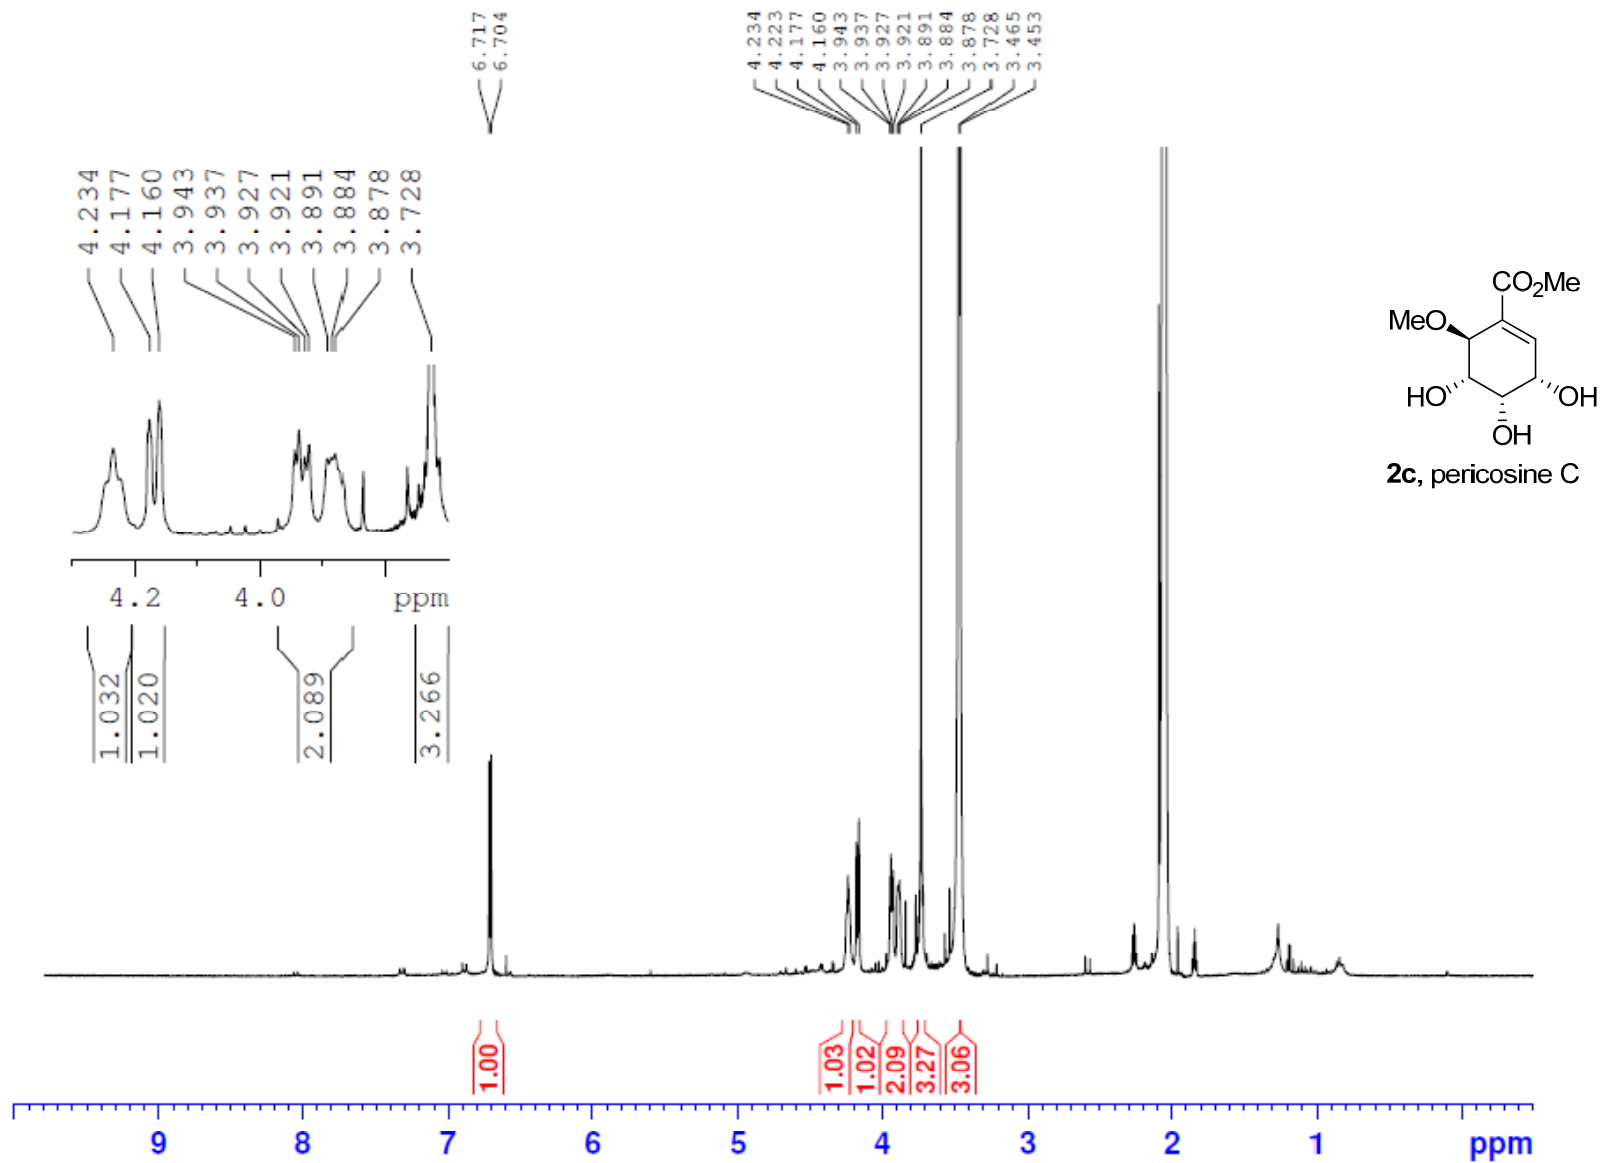

<sup>1</sup>H NMR (300 MHz, acetone-d<sub>6</sub>/D<sub>2</sub>O) compound **2c**



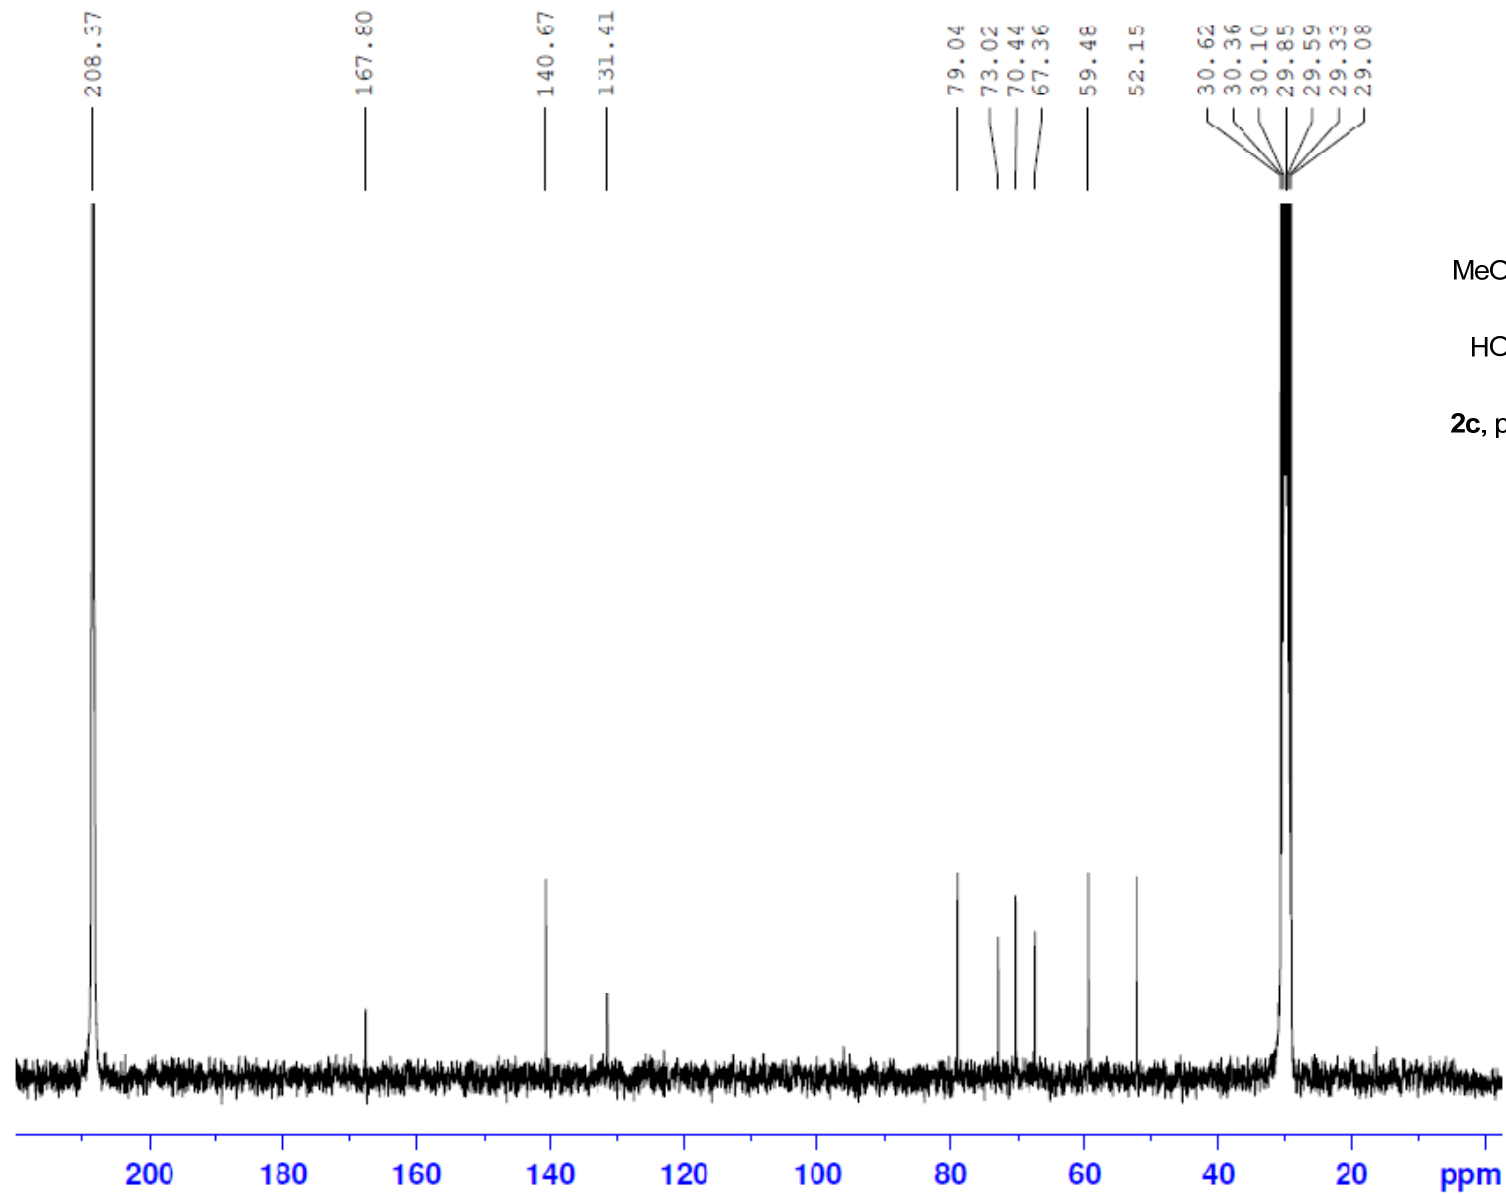

$^{13}\text{C}$  NMR (75 MHz, acetone- $\text{d}_6$ ) of compound **2c**



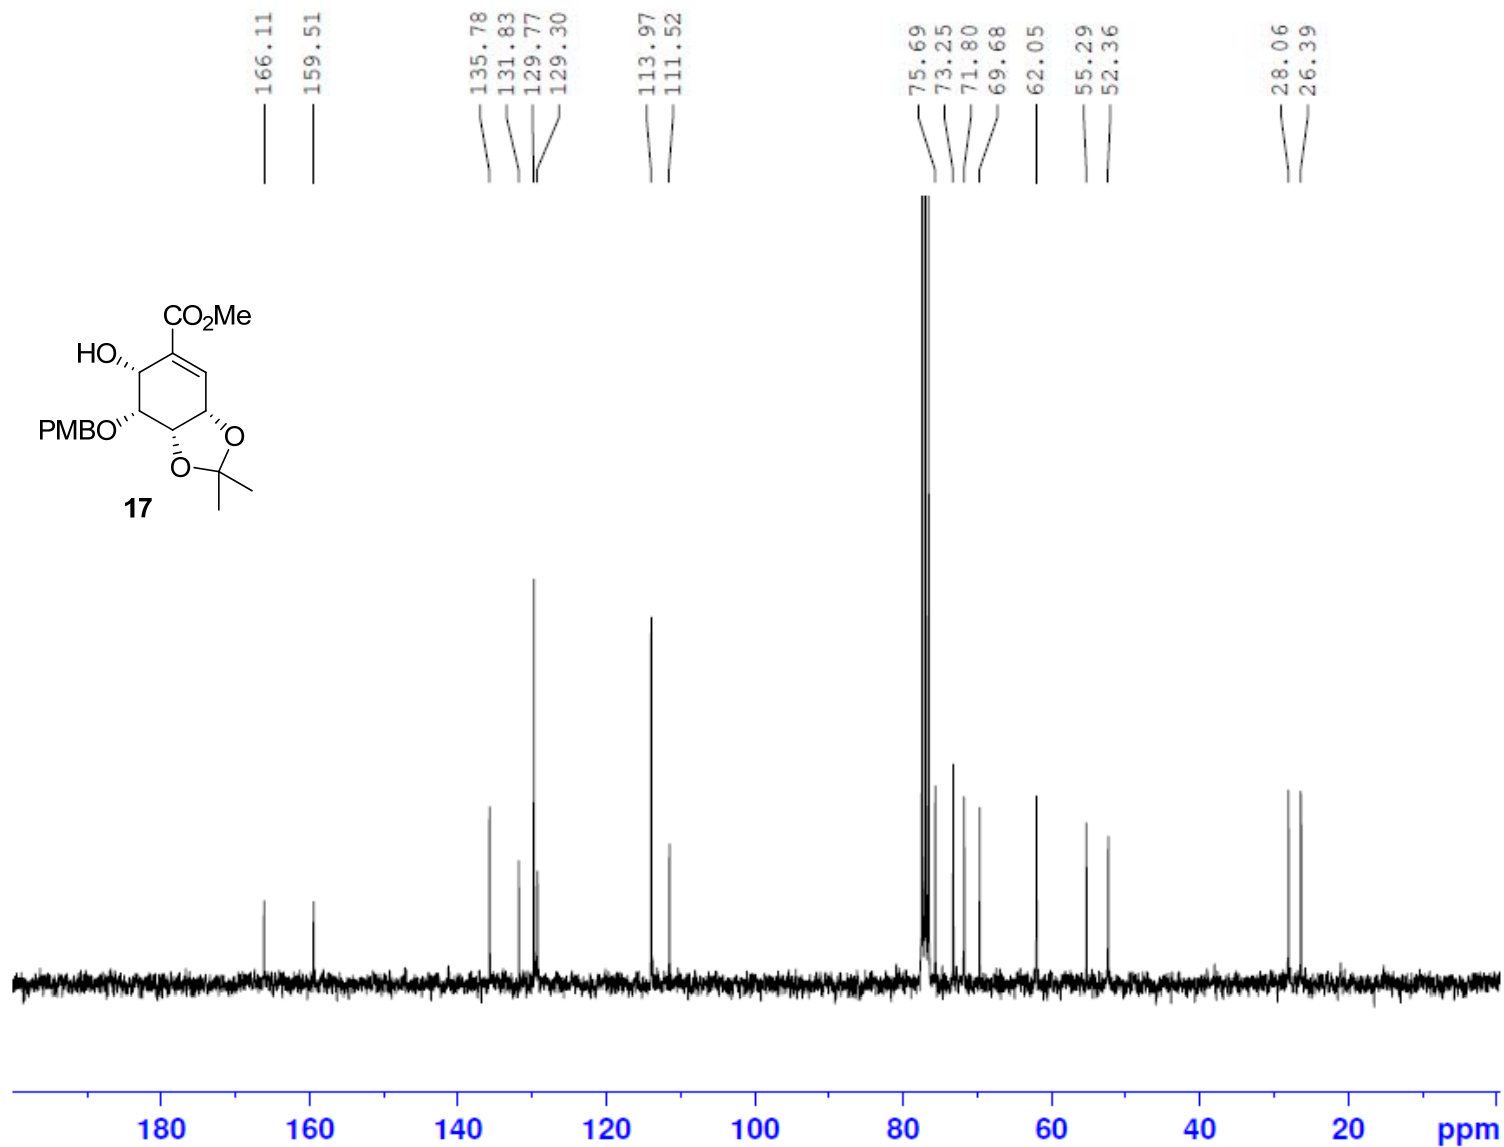

<sup>13</sup>C NMR(75 MHz CDCl<sub>3</sub>) of compound **17**

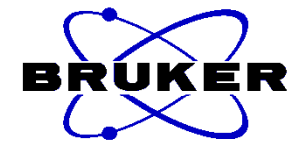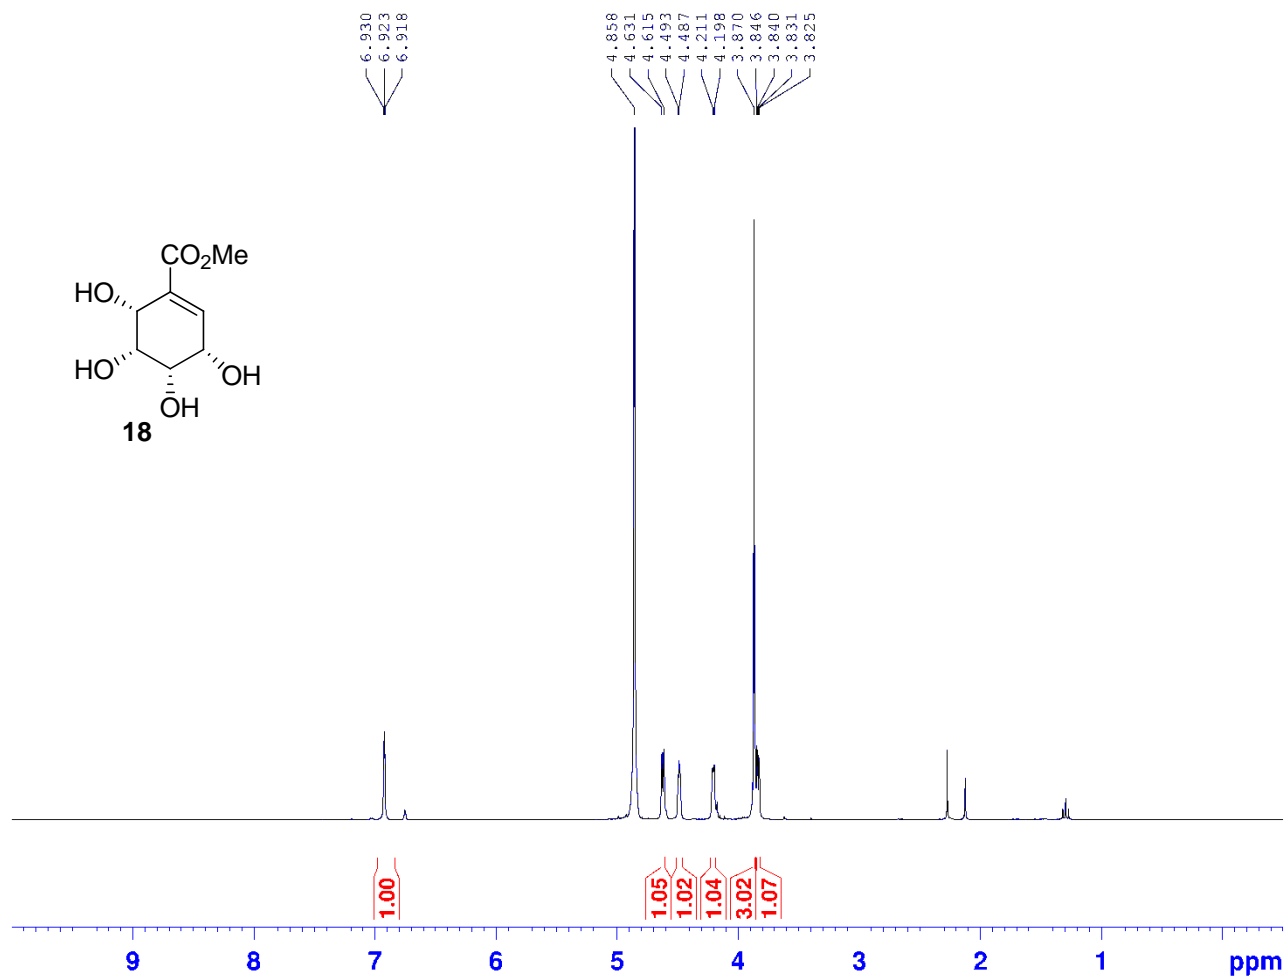

$^1\text{H}$  NMR(300 MHz  $\text{CDCl}_3$ ) of compound **18**

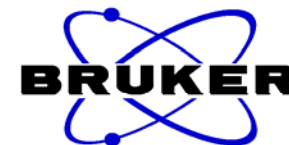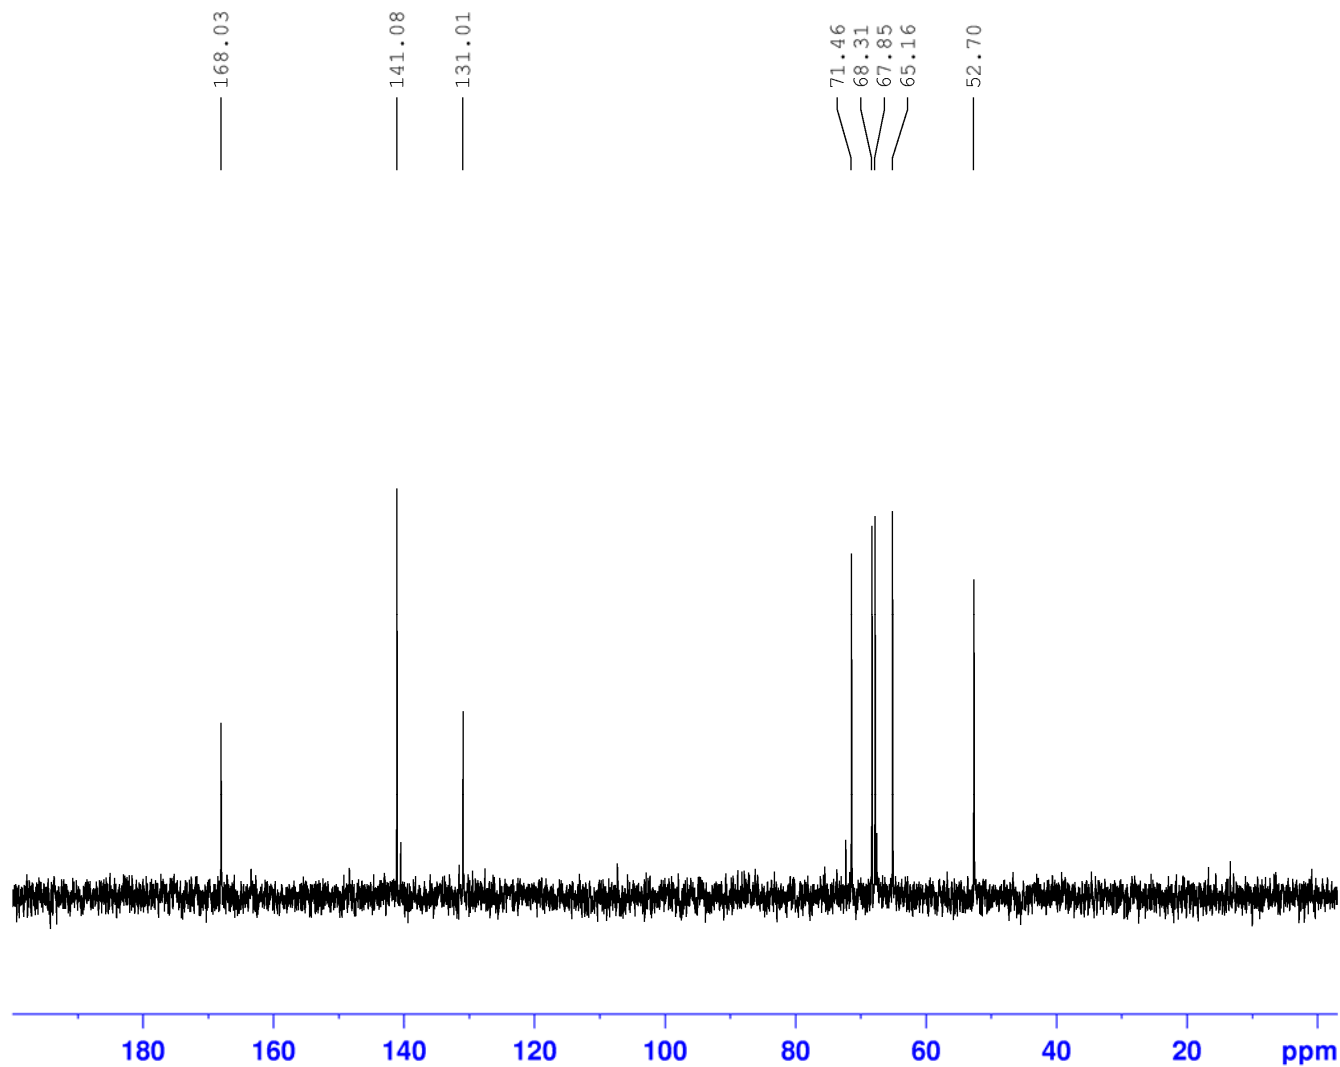

```
Current Data Parameters
NAME 20130327 ribose 10 TFA Cl3 pure
EXPNO 1
PROCNO 1

F2 - Acquisition Parameters
Date_ 20130327
Time 22.35
INSTRUM spect
PROBHD 5 mm PABBO BB-
PULPROG zgpg30
TD 32768
SOLVENT D2O
NS 1359
DS 0
SWH 17857.143 Hz
FIDRES 0.544957 Hz
AQ 0.9175540 sec
RG 2050
DM 29.000 usec
DE 6.00 usec
TE 300.0 K
D1 2.00000000 sec
d11 0.03000000 sec
DELTA 1.89999998 sec
TDO

===== CHANNEL f1 =====
NUC1 13C
P1 9.85 usec
PL1 0.00 dB
SFO1 75.4884982 MHz

===== CHANNEL f2 =====
CPDPRG2 waltz16
NUC2 1H
PCPD2 90.00 usec
PL12 17.70 dB
PL13 20.70 dB
PL2 0.50 dB
SFO2 300.1392007 MHz

F2 - Processing parameters
SI 16384
SF 75.4798039 MHz
WDW EM
SSB 0
LB 2.00 Hz
GB 0
PC 1.00
```

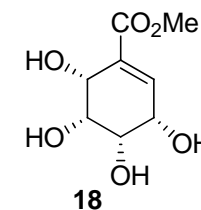

<sup>13</sup>C NMR(75 MHz CDCl<sub>3</sub>) of compound **18**
